# Supplementary material for: Gene polymorphisms in ULK1 and PIK3CA are associated with the risk of microscopic polyangiitis in the Guangxi Zhuang Autonomous Region in China
Source: PeerJ. 2021 Nov 9;9:e12377. doi: 10.7717/peerj.12377 (PMC8588863; doi:10.7717/peerj.12377)
Supplement: Supplemental Information 1 [file peerj-09-12377-s001.xlsx]

## Sheet: AAV group
Site_name	rs1607237	rs9838117
Gene	PIK3CA	PIK3CA
Chr	3	3
Start	178950297	178952507
End	178950297	178952507
Ref	C	G		ethnicity（1=Han，2=Zhuang）	gender(1=male 2=female)	age
1	C/C Ratio=0	G/G Ratio=0		2	1	55
2	C/C Ratio=0	G/G Ratio=0		2	2	65
3	T/T Ratio=100.00	G/T Ratio=44.26		1	2	38
4	C/C Ratio=0	G/G Ratio=0		1	1	75
5	C/C Ratio=0	G/G Ratio=0		2	1	29
6	C/C Ratio=0	G/G Ratio=0		1	2	42
7	C/C Ratio=0	G/G Ratio=0		1	2	30
8	C/C Ratio=0	G/G Ratio=0		2	1	40
9	C/C Ratio=0	G/G Ratio=0		1	1	74
10	T/T Ratio=100.00	T/T Ratio=100.00		2	1	57
11	C/T Ratio=50.00	G/T Ratio=39.51		1	1	45
12	T/T Ratio=100.00	G/T Ratio=36.36		1	2	69
13	C/C Ratio=0	G/G Ratio=0		1	1	54
14	C/C Ratio=0	G/G Ratio=0		1	2	41
15	C/T Ratio=40.00	G/G Ratio=0		1	1	54
16	C/C Ratio=0	G/G Ratio=0		2	2	58
17	C/C Ratio=0	G/G Ratio=0		2	2	23
18	C/C Ratio=0	G/G Ratio=0		1	2	47
19	T/T Ratio=100.00	G/T Ratio=50.25		2	2	42
20	C/C Ratio=0	G/G Ratio=0		2	1	26
21	C/T Ratio=57.14	G/G Ratio=0		1	1	23
22	C/C Ratio=0	G/G Ratio=0		1	2	56
23	T/T Ratio=100.00	T/T Ratio=100.00		2	1	61
24	C/C Ratio=0	G/G Ratio=0		2	2	70
25	C/C Ratio=0	G/G Ratio=0		1	2	54
26	C/T Ratio=66.67	G/T Ratio=43.75		1	2	47
27	C/C Ratio=0	G/G Ratio=0		1	2	59
28	C/C Ratio=0	G/G Ratio=0		1	1	63
29	T/T Ratio=100.00	G/T Ratio=50.00		1	1	61
30	C/C Ratio=0	G/G Ratio=0		2	1	22
31	C/T Ratio=33.33	G/T Ratio=36.21		2	2	56
32	C/T Ratio=51.43	G/G Ratio=0		1	1	41
33	C/C Ratio=0	G/G Ratio=0		2	1	43
34	C/T Ratio=61.11	G/T Ratio=51.35		2	2	78
35	C/T Ratio=66.67	G/G Ratio=0		1	2	55
36	C/C Ratio=0	G/G Ratio=0		1	1	58
37	C/C Ratio=0	G/G Ratio=0		1	1	41
38	C/C Ratio=0	G/G Ratio=0		1	1	41
39	C/C Ratio=0	G/G Ratio=0		1	1	82
40	C/C Ratio=0	G/G Ratio=0		1	2	20
41	C/T Ratio=37.50	G/G Ratio=0		1	1	26
42	C/C Ratio=0	G/G Ratio=0		1	1	28
43	C/C Ratio=0	G/G Ratio=0		1	2	27
44	C/T Ratio=38.10	G/T Ratio=45.05		2	2	63
45	C/C Ratio=0	G/G Ratio=0		1	2	48
46	C/T Ratio=34.29	G/T Ratio=43.12		2	2	66
47	C/C Ratio=0	G/G Ratio=0		1	1	22
48	C/T Ratio=52.63	G/T Ratio=48.05		1	2	56
49	C/C Ratio=0	G/G Ratio=0		1	2	54
50	C/T Ratio=57.14	G/G Ratio=0		2	2	64
51	C/T Ratio=40.00	G/T Ratio=45.16		1	2	58
52	C/T Ratio=63.64	G/T Ratio=43.07		1	2	40
53	T/T Ratio=100.00	G/T Ratio=47.06		1	1	60
54	C/C Ratio=0	G/G Ratio=0		1	2	41
55	C/C Ratio=0	G/G Ratio=0		1	2	68
56	T/T Ratio=100.00	G/G Ratio=0		2	1	52
57	C/C Ratio=0	G/G Ratio=0		2	2	58
58	C/C Ratio=0	G/G Ratio=0		2	1	29
59	C/T Ratio=30.77	G/T Ratio=49.34		2	2	78
60	C/C Ratio=0	G/G Ratio=0		2	2	67
61	C/T Ratio=50.00	G/T Ratio=44.68		2	2	32
62	C/C Ratio=0	G/G Ratio=0		1	1	58
63	C/T Ratio=60.00	G/T Ratio=46.40		1	2	55
64	C/C Ratio=0	G/G Ratio=0		1	2	74
65	T/T Ratio=100.00	G/T Ratio=48.57		2	2	61
66	T/T Ratio=100.00	T/T Ratio=100.00		1	2	61
67	T/T Ratio=100.00	G/T Ratio=51.30		2	2	41
68	C/C Ratio=0	G/G Ratio=0		1	1	61
69	C/C Ratio=0	G/G Ratio=0		2	1	30
70	C/C Ratio=0	G/G Ratio=0		1	2	65
71	T/T Ratio=100.00	G/T Ratio=39.52		1	2	19
72	C/C Ratio=0	G/G Ratio=0		1	1	74
73	NA/NA	G/G Ratio=0		1	2	32
74	C/C Ratio=0	G/G Ratio=0		1	1	69
75	C/C Ratio=0	G/G Ratio=0			2	63
76	C/T Ratio=55.56	G/T Ratio=42.22		2	1	58
77	C/T Ratio=61.54	G/T Ratio=47.66		2	2	61
78	C/C Ratio=0	G/G Ratio=0		1	2	61
79	C/T Ratio=54.84	G/T Ratio=48.32		1	1	57
80	T/T Ratio=100.00	T/T Ratio=100.00		2	2	67
81	C/C Ratio=0	G/G Ratio=0		1	1	54
82	C/C Ratio=0	G/G Ratio=0		1	2	60
83	C/T Ratio=50.00	G/T Ratio=57.69		1	1	75
84	T/T Ratio=100.00	T/T Ratio=100.00		1	2	76
85	C/C Ratio=0	G/G Ratio=0		1	2	74
86	NA/NA	G/G Ratio=0		1	2	62
87	NA/NA	G/G Ratio=0		2	2	30
88	C/C Ratio=0	G/G Ratio=0			2	70
89	C/C Ratio=0	G/G Ratio=0		1	2	43
90	C/T Ratio=50.00	G/T Ratio=63.16		1	2	19
91	C/C Ratio=0	G/G Ratio=0		2	2	77
92	C/C Ratio=0	G/G Ratio=0		1	2	43
93	C/C Ratio=0	G/G Ratio=0		1	2	59
94	C/T Ratio=66.67	G/T Ratio=54.08		2	2	50
95	C/C Ratio=0	G/G Ratio=0		2	2	19
96	NA/NA	G/G Ratio=0		1	1	59
97	T/T Ratio=100.00	G/T Ratio=40.22		1	2	69
98	T/T Ratio=100.00	G/T Ratio=47.24		2	1	64
99	C/C Ratio=0	G/G Ratio=0		1	2	54
100	C/T Ratio=60.00	G/G Ratio=0		1	1	59
101	C/C Ratio=0	G/G Ratio=0		1	2	73
102	C/T Ratio=47.83	G/T Ratio=38.63		2	2	35
103	NA/NA	G/G Ratio=0		2	2	43
104	C/C Ratio=0	G/T Ratio=33.33		1	2	54
105	C/T Ratio=33.33	G/T Ratio=54.72		1	2	29
106	C/C Ratio=0	G/T Ratio=58.97		1	1	50
107	C/C Ratio=0	G/G Ratio=0		2	2	65
108	NA/NA	G/G Ratio=0		1	2	40
109	C/C Ratio=0	G/G Ratio=0		1	1	64
110	C/C Ratio=0	G/G Ratio=0		1	2	54
111	C/C Ratio=0	G/T Ratio=35.71		1	2	30
112	C/T Ratio=60.00	G/G Ratio=0		2	1	39
113	C/C Ratio=0	G/G Ratio=0		1	2	69
114	C/C Ratio=0	G/G Ratio=0		2	2	75
115	C/C Ratio=0	G/G Ratio=0		1	2	53
116	C/C Ratio=0	G/T Ratio=46.09		1	2	33
117	T/T Ratio=100.00	G/T Ratio=48.34		2	1	54
118	C/C Ratio=0	G/G Ratio=0		1	2	75
119	C/T Ratio=45.83	G/G Ratio=0		1	1	51
120	C/C Ratio=0	G/G Ratio=0		1	2	49
121	C/C Ratio=0	G/G Ratio=0		2	1	58
122	C/T Ratio=33.33	G/G Ratio=0		2	2	36
123	NA/NA	G/T Ratio=51.72		1	1	67
124	C/T Ratio=50.00	G/T Ratio=51.02		1	2	72
125	C/C Ratio=0	G/G Ratio=0		1	2	63
126	C/C Ratio=0	G/G Ratio=0		2	1	42
127	C/T Ratio=40.00	G/G Ratio=0		1	2	33
128	C/C Ratio=0	G/G Ratio=0		1	2	63
129	C/C Ratio=0	G/G Ratio=0		2	1	47
130	C/C Ratio=0	G/G Ratio=0		2	2	60
131	C/C Ratio=0	G/G Ratio=0		2	1	64
132	C/T Ratio=55.77	G/G Ratio=0		2	1	63
133	C/C Ratio=0	G/G Ratio=0		2	1	76
134	C/C Ratio=0	G/G Ratio=0		1	2	63
135	C/C Ratio=0	G/G Ratio=0		1	2	63
136	T/T Ratio=100.00	G/T Ratio=42.40		1	2	69
137	C/C Ratio=0	G/G Ratio=0		2	2	48
138	C/C Ratio=0	G/G Ratio=0		1	2	56
139	C/C Ratio=0	G/G Ratio=0		1	1	50
140	C/C Ratio=0	G/G Ratio=0		1	2	67
141	C/T Ratio=55.56	G/G Ratio=0		1	2	64
142	C/C Ratio=0	G/G Ratio=0		1	1	61
143	C/C Ratio=0	G/G Ratio=0		1	1	73
144	C/C Ratio=0	G/G Ratio=0		2	1	71
145	C/C Ratio=0	G/G Ratio=0		2	2	30
146	C/C Ratio=0	G/G Ratio=0		2	2	65
147	C/C Ratio=0	G/T Ratio=47.62		1	1	74
148	C/C Ratio=0	G/G Ratio=0		2	2	21
149	C/C Ratio=0	G/G Ratio=0		2	2	69
150	C/C Ratio=0	G/G Ratio=0		1	2	58
151	C/C Ratio=0	G/G Ratio=0		2	2	62
152	C/C Ratio=0	G/G Ratio=0		2	1	53
153	C/C Ratio=0	G/G Ratio=0		1	1	70
154	T/T Ratio=100.00	G/T Ratio=37.50		2	1	53
155	C/C Ratio=0	G/G Ratio=0		1	2	64
156	T/T Ratio=100.00	G/T Ratio=45.65		2	1	56
157	C/C Ratio=0	G/G Ratio=0		2	2	44
158	T/T Ratio=100.00	G/T Ratio=39.33		1	2	47
159	C/C Ratio=0	G/G Ratio=0		1	2	62
160	C/C Ratio=0	G/G Ratio=0		1	2	62
161	T/T Ratio=100.00	G/G Ratio=0		1	2	68
162	C/C Ratio=0	G/G Ratio=0		1	1	51
163	C/C Ratio=0	G/G Ratio=0		1	2	62
164	C/T Ratio=40.00	G/T Ratio=45.00		1	1	64
165	C/C Ratio=0	G/G Ratio=0		1	2	75
166	C/C Ratio=0	G/G Ratio=0		1	1	61
167	C/C Ratio=0	G/G Ratio=0		1	2	60
168	C/C Ratio=0	G/G Ratio=0		1	1	60
169	C/C Ratio=0	G/G Ratio=0		1	2	62
170	T/T Ratio=100.00	T/T Ratio=100.00		2	2	55
171	T/T Ratio=100.00	G/G Ratio=0		1	1	67
172	C/T Ratio=53.85	G/T Ratio=42.59		2	2	48
173	C/C Ratio=0	G/G Ratio=0		1	1	59
174	C/T Ratio=50.00	G/T Ratio=50.00		2	1	40
175	C/C Ratio=0	G/G Ratio=0		1	2	61
176	C/C Ratio=0	G/G Ratio=0		1	1	66
177	C/T Ratio=57.14	G/T Ratio=61.11		1	2	45
178	T/T Ratio=100.00	G/T Ratio=48.28		1	1	47
179	C/T Ratio=47.06	G/T Ratio=51.04		1	2	46
180	C/C Ratio=0	G/G Ratio=0		1	1	63
181	C/C Ratio=0	G/G Ratio=0		2	1	48
182	C/C Ratio=0	G/T Ratio=50.00		1	2	59
183	NA/NA	G/G Ratio=0		2	2	52
184	T/T Ratio=100.00	T/T Ratio=100.00		2	2	56
185	C/T Ratio=50.00	G/G Ratio=0		2	2	56
186	C/C Ratio=0	G/G Ratio=0		1	2	59
187	C/T Ratio=45.45	G/T Ratio=45.71		1	2	53
188	C/C Ratio=0	G/G Ratio=0		1	1	64
189	C/C Ratio=0	G/G Ratio=0		2	2	67
190	C/C Ratio=0	G/G Ratio=0		1	1	65
191	C/C Ratio=0	G/G Ratio=0		1	2	68
192	C/C Ratio=0	G/G Ratio=0		2	2	66
193	C/C Ratio=0	G/G Ratio=0		1	1	72
194	C/C Ratio=0	G/G Ratio=0		1	1	72
195	C/C Ratio=0	G/G Ratio=0		1	1	64
196	C/T Ratio=60.00	G/T Ratio=59.46		1	2	19
197	C/C Ratio=0	G/G Ratio=0		1	2	51
198	C/T Ratio=57.14	G/T Ratio=38.41		1	1	66
199	C/T Ratio=57.14	G/T Ratio=44.66		1	2	65
200	C/T Ratio=62.50	G/T Ratio=35.00		2	2	18
201	C/C Ratio=0	G/G Ratio=0		1	2	51
202	C/C Ratio=0	G/G Ratio=0		1	1	65
203	NA/NA	G/T Ratio=51.35		2	2	66
204	C/C Ratio=0	G/T Ratio=40.00		2	2	74
205	C/C Ratio=0	G/G Ratio=0		1	2	71
206	C/C Ratio=0	G/G Ratio=0		2	2	53
207	C/C Ratio=0	G/G Ratio=0		2	2	69
208	C/C Ratio=0	G/G Ratio=0		2	2	41

## Sheet: Control group
Site_name	rs1607237	rs9838117
Gene	PIK3CA	PIK3CA
Chr	3	3
Start	178950297	178952507
End	178950297	178952507
Ref	C	G	gender (1=male, 2=female)	age
1	C/T Ratio=52.94	G/G Ratio=0	1	70
2	C/C Ratio=0	G/G Ratio=0	1	81
3	C/T Ratio=46.43	G/T Ratio=42.02	2	48
4	C/T Ratio=55.56	G/T Ratio=44.73	2	60
5	C/C Ratio=0	G/G Ratio=0	2	68
6	C/T Ratio=42.86	G/G Ratio=0	2	61
7	C/T Ratio=53.33	G/T Ratio=48.37	2	54								z
8	C/T Ratio=30.56	G/G Ratio=0	2	77
9	C/T Ratio=33.33	G/G Ratio=0	1	73
10	C/C Ratio=0	G/G Ratio=0	2	81
11	C/C Ratio=0	G/G Ratio=0	1	63
12	C/C Ratio=0	G/G Ratio=0	2	50
13	C/C Ratio=0	G/G Ratio=0	2	33
14	C/C Ratio=0	G/G Ratio=0	2	19
15	C/C Ratio=0	G/G Ratio=0	1	54
16	C/T Ratio=37.50	G/G Ratio=0	2	54
17	C/C Ratio=0	G/G Ratio=0	2	35
18	C/C Ratio=0	G/G Ratio=0	2	55
19	C/C Ratio=0	G/T Ratio=45.07	2	72
20	C/T Ratio=57.14	G/T Ratio=49.87	1	77
21	C/T Ratio=38.89	G/T Ratio=46.67	2	70
22	C/C Ratio=0	G/G Ratio=0	2	35
23	T/T Ratio=100.00	G/G Ratio=0	1	25
24	C/T Ratio=52.50	G/T Ratio=44.64	2	38
25	C/C Ratio=0	G/G Ratio=0	1	69
26	C/C Ratio=0	G/G Ratio=0	2	42
27	C/T Ratio=40.00	G/T Ratio=48.65	1	51
28	C/T Ratio=38.10	G/G Ratio=0	2	74
29	C/T Ratio=51.52	G/T Ratio=45.00	2	44
30	C/T Ratio=61.11	G/G Ratio=0	2	51
31	C/C Ratio=0	G/G Ratio=0	2	56
32	C/C Ratio=0	G/G Ratio=0	2	42
33	C/C Ratio=0	G/G Ratio=0	2	31
34	C/C Ratio=0	G/G Ratio=0	2	56
35	T/T Ratio=100.00	G/G Ratio=0	2	47
36	C/C Ratio=0	G/G Ratio=0	1	57
37	C/C Ratio=0	G/G Ratio=0	1	47
38	C/C Ratio=0	G/G Ratio=0	1	68
39	C/C Ratio=0	G/G Ratio=0	2	38
40	C/T Ratio=50.00	G/T Ratio=47.62	1	45
41	C/T Ratio=51.28	G/G Ratio=0	1	64
42	C/T Ratio=59.14	G/T Ratio=50.24	1	61
43	C/T Ratio=55.81	G/G Ratio=0	1	26
44	C/C Ratio=0	G/G Ratio=0	1	68
45	C/T Ratio=60.00	G/G Ratio=0	1	47
46	C/C Ratio=0	G/G Ratio=0	2	47
47	C/C Ratio=0	G/G Ratio=0	1	60
48	C/T Ratio=53.33	G/G Ratio=0	2	30
49	C/T Ratio=60.00	G/G Ratio=0	2	54
50	C/T Ratio=58.33	G/G Ratio=0	1	35
51	C/T Ratio=52.83	G/T Ratio=47.12	1	79
52	C/C Ratio=0	G/G Ratio=0	1	52
53	C/C Ratio=0	G/G Ratio=0	2	70
54	C/C Ratio=0	G/G Ratio=0	1	60
55	C/C Ratio=0	G/G Ratio=0	1	39
56	C/T Ratio=63.27	G/T Ratio=42.72	2	61
57	C/C Ratio=0	G/G Ratio=0	2	49
58	C/T Ratio=57.14	G/T Ratio=52.45	2	45
59	C/T Ratio=66.67	G/T Ratio=48.24	1	46
60	C/C Ratio=0	G/G Ratio=0	2	39
61	C/T Ratio=54.13	G/G Ratio=0	1	50
62	C/C Ratio=0	G/G Ratio=0	2	48
63	C/T Ratio=44.44	G/T Ratio=40.35	1	18
64	C/C Ratio=0	G/G Ratio=0	2	35
65	T/T Ratio=100.00	T/T Ratio=100.00	1	56
66	C/T Ratio=55.88	G/T Ratio=44.90	1	81
67	C/T Ratio=56.76	G/G Ratio=0	2	34
68	C/T Ratio=48.00	G/T Ratio=43.70	2	55
69	C/C Ratio=0	G/G Ratio=0	2	45
70	C/C Ratio=0	G/G Ratio=0	1	33
71	C/C Ratio=0	G/G Ratio=0	2	39
72	C/C Ratio=0	G/G Ratio=0	2	36
73	C/C Ratio=0	G/G Ratio=0	1	40
74	C/T Ratio=65.79	G/T Ratio=47.14	1	27
75	C/C Ratio=0	G/G Ratio=0	1	52
76	T/T Ratio=100.00	G/G Ratio=0	2	21
77	C/T Ratio=41.18	G/T Ratio=48.96	1	19
78	C/T Ratio=54.55	G/T Ratio=45.74	2	40
79	T/T Ratio=100.00	G/T Ratio=47.32	1	35
80	C/C Ratio=0	G/G Ratio=0	1	70
81	T/T Ratio=100.00	G/T Ratio=47.37	2	18
82	T/T Ratio=100.00	G/G Ratio=0	2	46
83	C/T Ratio=33.33	G/T Ratio=49.41	2	66
84	C/T Ratio=38.89	G/G Ratio=0	2	81
85	C/T Ratio=56.67	G/G Ratio=0	2	52
86	C/C Ratio=0	G/G Ratio=0	2	65
87	C/T Ratio=70.00	G/G Ratio=0	2	41
88	C/C Ratio=0	G/G Ratio=0	2	70
89	C/C Ratio=0	G/G Ratio=0	2	71
90	C/T Ratio=47.67	G/G Ratio=0	2	52
91	C/C Ratio=0	G/G Ratio=0	2	44
92	C/C Ratio=0	G/G Ratio=0	2	76
93	C/T Ratio=46.94	G/T Ratio=45.64	2	47
94	C/C Ratio=0	G/G Ratio=0	1	59
95	C/T Ratio=51.85	G/G Ratio=0	1	51
96	T/T Ratio=100.00	G/G Ratio=0	2	64
97	C/T Ratio=62.50	G/G Ratio=0	2	37
98	T/T Ratio=100.00	T/T Ratio=100.00	1	65
99	C/C Ratio=0	G/G Ratio=0	2	38
100	C/C Ratio=0	G/G Ratio=0	2	45
101	C/C Ratio=0	G/G Ratio=0	2	51
102	C/C Ratio=0	G/G Ratio=0	2	43
103	C/C Ratio=0	G/G Ratio=0	2	58
104	C/C Ratio=0	G/G Ratio=0	2	51
105	C/C Ratio=0	G/G Ratio=0	2	64
106	C/T Ratio=51.43	G/T Ratio=47.84	2	51
107	C/C Ratio=0	G/G Ratio=0	2	47
108	C/T Ratio=51.67	G/G Ratio=0	2	67
109	C/C Ratio=0	G/G Ratio=0	2	41
110	C/T Ratio=51.35	G/T Ratio=47.73	2	53
111	T/T Ratio=100.00	T/T Ratio=100.00	2	29
112	C/C Ratio=0	G/G Ratio=0	2	54
113	C/T Ratio=33.33	G/G Ratio=0	2	52
114	C/T Ratio=62.50	G/G Ratio=0	2	41
115	C/T Ratio=56.52	G/T Ratio=52.50	1	68
116	T/T Ratio=100.00	T/T Ratio=100.00	1	69
117	C/C Ratio=0	G/G Ratio=0	2	52
118	C/T Ratio=50.00	G/G Ratio=0	1	52
119	C/T Ratio=55.00	G/G Ratio=0	2	63
120	T/T Ratio=100.00	T/T Ratio=100.00	2	55
121	C/C Ratio=0	G/G Ratio=0	2	51
122	C/C Ratio=0	G/G Ratio=0	1	51
123	C/T Ratio=33.33	G/T Ratio=55.17	2	40
124	C/C Ratio=0	G/G Ratio=0	2	52
125	C/C Ratio=0	G/G Ratio=0	2	54
126	C/T Ratio=57.89	G/G Ratio=0	2	58
127	T/T Ratio=100.00	G/G Ratio=0	2	41
128	C/C Ratio=0	G/G Ratio=0	1	38
129	C/C Ratio=0	G/G Ratio=0	2	53
130	C/T Ratio=66.67	G/G Ratio=0	2	44
131	C/T Ratio=34.62	G/T Ratio=45.00	1	48
132	C/C Ratio=0	G/G Ratio=0	1	48
133	C/T Ratio=70.00	G/G Ratio=0	2	51
134	C/C Ratio=0	G/G Ratio=0	1	52
135	C/C Ratio=0	G/G Ratio=0	1	47
136	C/T Ratio=35.71	G/T Ratio=45.29	1	59
137	C/C Ratio=0	G/G Ratio=0	1	52
138	T/T Ratio=100.00	G/T Ratio=46.88	1	50
139	C/T Ratio=52.50	G/T Ratio=39.33	1	48
140	T/T Ratio=100.00	G/T Ratio=40.86	1	58
141	C/C Ratio=0	G/G Ratio=0	1	61
142	C/T Ratio=58.82	G/G Ratio=0	1	51
143	C/C Ratio=0	G/G Ratio=0	1	52
144	T/T Ratio=100.00	G/T Ratio=44.29	2	57
145	C/T Ratio=60.00	G/G Ratio=0	1	57
146	C/C Ratio=0	G/G Ratio=0
147	NA/NA	NA/NA	1	64
148	C/C Ratio=0	G/G Ratio=0	2	61
149	NA/NA	NA/NA	2	61
150	C/T Ratio=66.67	G/G Ratio=0	2	50
151	C/C Ratio=0	G/G Ratio=0	1	62
152	C/T Ratio=50.00	G/T Ratio=39.10	2	49
153	C/C Ratio=0	G/G Ratio=0	2	70
154	C/C Ratio=0	G/G Ratio=0	2	43
155	C/C Ratio=0	G/G Ratio=0	2	43
156	T/T Ratio=100.00	T/T Ratio=100.00	1	52
157	C/T Ratio=42.86	G/G Ratio=0	1	61
158	T/T Ratio=100.00	G/G Ratio=0	2	35
159	C/C Ratio=0	G/G Ratio=0	1	53
160	C/C Ratio=0	G/G Ratio=0	2	60
161	C/C Ratio=0	G/G Ratio=0	2	44
162	C/T Ratio=38.89	G/T Ratio=56.00	2	62
163	C/T Ratio=50.00	G/G Ratio=0	2	55
164	C/C Ratio=0	G/G Ratio=0	1	52
165	C/C Ratio=0	G/G Ratio=0	2	54
166	T/T Ratio=100.00	G/T Ratio=50.00	2	44
167	C/C Ratio=0	G/G Ratio=0	2	58
168	C/T Ratio=50.00	G/T Ratio=40.83	1	44
169	T/T Ratio=100.00	T/T Ratio=100.00	1	58
170	T/T Ratio=100.00	G/T Ratio=53.57	1	47
171	C/T Ratio=47.62	G/T Ratio=43.28	1	51
172	C/C Ratio=0	G/G Ratio=0	1	45
173	C/C Ratio=0	G/G Ratio=0	1	46
174	C/C Ratio=0	G/G Ratio=0	1	45
175	C/C Ratio=0	G/G Ratio=0	1	40
176	T/T Ratio=100.00	G/T Ratio=42.08	1	57
177	C/C Ratio=0	G/G Ratio=0	1	45
178	C/C Ratio=0	G/G Ratio=0	1	64
179	C/C Ratio=0	G/G Ratio=0	2	56
180	T/T Ratio=100.00	G/T Ratio=67.71	1	22
181	C/C Ratio=0	G/G Ratio=0	1	49
182	C/T Ratio=50.00	G/G Ratio=0	1	47
183	C/T Ratio=67.57	G/G Ratio=0	2	48
184	C/C Ratio=0	G/G Ratio=0	1	51
185	T/T Ratio=100.00	G/G Ratio=0	1	49
186	C/C Ratio=0	G/G Ratio=0	1	61
187	C/T Ratio=42.86	G/T Ratio=36.89	2	50
188	C/T Ratio=33.33	G/G Ratio=0	2	34
189	C/T Ratio=55.56	G/G Ratio=0	2	53
190	T/T Ratio=100.00	G/G Ratio=0	1	51
191	C/T Ratio=44.44	G/T Ratio=49.40	2	63
192	C/C Ratio=0	G/G Ratio=0	1	52
193	C/C Ratio=0	G/G Ratio=0	2	56
194	T/T Ratio=100.00	T/T Ratio=100.00	2	49
195	C/T Ratio=50.00	G/T Ratio=50.00	2	44
196	C/T Ratio=66.67	G/T Ratio=31.87	2	59
197	C/C Ratio=0	G/G Ratio=0	2	63
198	C/C Ratio=0	G/G Ratio=0	2	48
199	T/T Ratio=100.00	T/T Ratio=100.00	2	53
200	C/C Ratio=0	G/G Ratio=0	2	53
201	C/C Ratio=0	G/T Ratio=33.33	2	50
202	NA/NA	G/G Ratio=0	2	53
203	C/T Ratio=68.57	G/T Ratio=42.74	2	45
204	C/T Ratio=40.00	G/G Ratio=0	2	31
205	C/C Ratio=0	G/G Ratio=0	2	46
206	C/C Ratio=0	G/G Ratio=0	2	32
207	C/T Ratio=62.50	G/T Ratio=44.96	2	51
208	C/C Ratio=0	G/G Ratio=0	2	53
209	C/T Ratio=33.33	G/G Ratio=0	2	52
210	C/C Ratio=0	G/G Ratio=0	2	49
211	T/T Ratio=100.00	G/T Ratio=34.71	2	39
