# Supplementary material for: Gene polymorphisms in ULK1 and PIK3CA are associated with the risk of microscopic polyangiitis in the Guangxi Zhuang Autonomous Region in China
Source: PeerJ. 2021 Nov 9;9:e12377. doi: 10.7717/peerj.12377 (PMC8588863; doi:10.7717/peerj.12377)
Supplement: Supplemental Information 2 [file peerj-09-12377-s002.xlsx]

## Sheet: ULK1  AAV group
	rs10902469	rs12303764	rs4964879	rs7300908	rs7138581	rs9481
	ULK1	ULK1	ULK1	ULK1	ULK1	ULK1
	12	12	12	12	12	12
	132378133	132399065	132400309	132405421	132406666	132407089
	132378133	132399065	132400309	132405421	132406666	132407089
	G	T	G	C	G	A	ethnicity（1=Han，2=Zhuang）	gender(1=male 2=female)	age
1	G/G Ratio=0	T/G Ratio=34.48	G/A Ratio=48.85	C/C Ratio=0	G/G Ratio=0	A/G Ratio=50.21	2	1	55
2	G/C Ratio=52.66	T/T Ratio=0	A/A Ratio=100.00	C/C Ratio=0	G/C Ratio=49.23	A/G Ratio=52.22	2	2	65
3	G/G Ratio=0	T/G Ratio=51.27	G/A Ratio=47.49	C/C Ratio=0	G/G Ratio=0	A/G Ratio=53.47	1	2	38
4	G/C Ratio=50.39	T/T Ratio=0	A/A Ratio=100.00	C/C Ratio=0	G/C Ratio=46.15	A/G Ratio=51.92	1	1	75
5	G/G Ratio=0	T/T Ratio=0	G/A Ratio=50.39	C/T Ratio=44.19	G/C Ratio=50.83	A/A Ratio=0	2	1	29
6	G/G Ratio=0	T/T Ratio=0	A/A Ratio=100.00	C/C Ratio=0	G/G Ratio=0	A/A Ratio=0	1	2	42
7	G/G Ratio=0	T/G Ratio=47.95	G/A Ratio=51.08	C/C Ratio=0	G/G Ratio=0	G/G Ratio=100.00	1	2	30
8	G/G Ratio=0	T/T Ratio=0	A/A Ratio=100.00	C/C Ratio=0	G/G Ratio=0	A/A Ratio=0	2	1	40
9	G/G Ratio=0	T/T Ratio=0	G/A Ratio=46.37	C/C Ratio=0	G/G Ratio=0	A/G Ratio=54.04	1	1	74
10	G/G Ratio=0	T/T Ratio=0	G/A Ratio=50.00	C/T Ratio=45.36	G/C Ratio=55.22	A/A Ratio=0	2	1	57
11	G/C Ratio=50.72	T/T Ratio=0	A/A Ratio=100.00	C/C Ratio=0	G/C Ratio=37.65	A/G Ratio=56.62	1	1	45
12	G/G Ratio=0	T/G Ratio=48.92	G/A Ratio=46.35	C/C Ratio=0	G/G Ratio=0	A/G Ratio=54.74	1	2	69
13	G/G Ratio=0	T/T Ratio=0	G/A Ratio=47.75	C/C Ratio=0	G/G Ratio=0	A/A Ratio=0	1	1	54
14	G/G Ratio=0	T/G Ratio=51.73	G/G Ratio=0	C/T Ratio=50.00	G/C Ratio=56.58	G/G Ratio=100.00	1	2	41
15	G/G Ratio=0	T/G Ratio=49.67	G/A Ratio=49.28	C/C Ratio=0	G/G Ratio=0	A/A Ratio=0	1	1	54
16	G/G Ratio=0	G/G Ratio=100.00	G/G Ratio=0	C/C Ratio=0	G/G Ratio=0	G/G Ratio=100.00	2	2	58
17	G/G Ratio=0	T/T Ratio=0	G/G Ratio=0	C/C Ratio=0	G/C Ratio=37.20	G/G Ratio=100.00	2	2	23
18	G/G Ratio=0	T/T Ratio=0	A/A Ratio=100.00	C/C Ratio=0	G/G Ratio=0	A/A Ratio=0	1	2	47
19	G/G Ratio=0	T/T Ratio=0	A/A Ratio=100.00	C/C Ratio=0	G/G Ratio=0	A/A Ratio=0	2	2	42
20	G/G Ratio=0	T/T Ratio=0	G/A Ratio=42.20	C/T Ratio=52.83	G/C Ratio=47.62	A/G Ratio=55.62	2	1	26
21	G/C Ratio=49.47	T/G Ratio=46.97	G/A Ratio=51.82	C/C Ratio=0	G/C Ratio=54.95	G/G Ratio=100.00	1	1	23
22	G/G Ratio=0	T/T Ratio=0	G/A Ratio=52.94	C/C Ratio=0	G/G Ratio=0	A/G Ratio=61.36	1	2	56
23	G/G Ratio=0	T/T Ratio=0	G/A Ratio=49.57	C/T Ratio=54.79	G/C Ratio=32.86	A/A Ratio=0	2	1	61
24	G/G Ratio=0	T/T Ratio=0	A/A Ratio=100.00	C/C Ratio=0	G/G Ratio=0	A/A Ratio=0	2	2	70
25	G/G Ratio=0	T/G Ratio=32.44	G/G Ratio=0	C/C Ratio=0	G/C Ratio=43.83	G/G Ratio=100.00	1	2	54
26	G/C Ratio=51.71	T/T Ratio=0	A/A Ratio=100.00	C/C Ratio=0	G/C Ratio=50.00	A/G Ratio=60.07	1	2	47
27	G/G Ratio=0	T/T Ratio=0	G/A Ratio=47.26	C/T Ratio=57.35	G/C Ratio=53.01	A/A Ratio=0	1	2	59
28	G/G Ratio=0	T/T Ratio=0	A/A Ratio=100.00	C/C Ratio=0	G/G Ratio=0	A/A Ratio=0	1	1	63
29	G/G Ratio=0	T/G Ratio=48.87	G/G Ratio=0	C/T Ratio=56.35	G/C Ratio=47.22	G/G Ratio=100.00	1	1	61
30	G/G Ratio=0	T/T Ratio=0	G/A Ratio=47.57	C/T Ratio=52.43	G/C Ratio=47.67	G/G Ratio=100.00	2	1	22
31	G/G Ratio=0	T/T Ratio=0	A/A Ratio=100.00	C/C Ratio=0	G/G Ratio=0	A/A Ratio=0	2	2	56
32	G/G Ratio=0	T/T Ratio=0	G/A Ratio=43.93	C/T Ratio=36.24	G/C Ratio=46.86	G/G Ratio=100.00	1	1	41
33	G/G Ratio=0	T/T Ratio=0	G/A Ratio=45.34	C/C Ratio=0	G/G Ratio=0	A/G Ratio=53.53	2	1	43
34	G/G Ratio=0	T/G Ratio=48.80	G/A Ratio=47.26	C/C Ratio=0	G/G Ratio=0	A/G Ratio=55.90	2	2	78
35	G/G Ratio=0	T/G Ratio=42.35	G/A Ratio=47.89	C/C Ratio=0	G/G Ratio=0	A/G Ratio=54.57	1	2	55
36	G/G Ratio=0	T/G Ratio=47.48	G/A Ratio=47.98	C/C Ratio=0	G/G Ratio=0	A/G Ratio=58.72	1	1	58
37	G/G Ratio=0	T/G Ratio=49.35	G/A Ratio=52.33	C/C Ratio=0	G/G Ratio=0	A/G Ratio=51.85	1	1	41
38	G/G Ratio=0	T/G Ratio=44.53	G/G Ratio=0	C/C Ratio=0	G/G Ratio=0	G/G Ratio=100.00	1	1	41
39	G/G Ratio=0	T/T Ratio=0	A/A Ratio=100.00	C/C Ratio=0	G/G Ratio=0	A/A Ratio=0	1	1	82
40	G/G Ratio=0	T/G Ratio=50.16	G/G Ratio=0	C/C Ratio=0	G/G Ratio=0	G/G Ratio=100.00	1	2	20
41	G/G Ratio=0	T/T Ratio=0	A/A Ratio=100.00	C/C Ratio=0	G/G Ratio=0	A/A Ratio=0	1	1	26
42	G/C Ratio=50.75	T/T Ratio=0	A/A Ratio=100.00	C/C Ratio=0	G/C Ratio=47.83	A/G Ratio=55.09	1	1	28
43	G/G Ratio=0	T/G Ratio=48.28	G/A Ratio=49.36	C/C Ratio=0	G/G Ratio=0	A/G Ratio=54.84	1	2	27
44	G/C Ratio=49.72	T/G Ratio=48.85	G/A Ratio=49.74	C/C Ratio=0	G/C Ratio=43.17	G/G Ratio=100.00	2	2	63
45	G/G Ratio=0	T/G Ratio=48.54	G/G Ratio=0	C/C Ratio=0	G/G Ratio=0	G/G Ratio=100.00	1	2	48
46	G/G Ratio=0	T/T Ratio=0	G/G Ratio=0	T/T Ratio=100.00	C/C Ratio=100.00	G/G Ratio=100.00	2	2	66
47	G/G Ratio=0	T/G Ratio=50.40	G/A Ratio=48.35	C/C Ratio=0	G/G Ratio=0	A/G Ratio=60.43	1	1	22
48	G/G Ratio=0	T/G Ratio=46.37	G/G Ratio=0	C/T Ratio=45.93	G/C Ratio=56.33	G/G Ratio=100.00	1	2	56
49	G/C Ratio=49.59	T/T Ratio=0	G/A Ratio=57.82	C/C Ratio=0	G/C Ratio=48.55	A/G Ratio=58.59	1	2	54
50	G/G Ratio=0	T/T Ratio=0	G/A Ratio=51.80	C/C Ratio=0	G/G Ratio=0	A/A Ratio=0	2	2	64
51	G/G Ratio=0	T/T Ratio=0	A/A Ratio=100.00	C/C Ratio=0	G/G Ratio=0	A/A Ratio=0	1	2	58
52	G/G Ratio=0	T/T Ratio=0	A/A Ratio=100.00	C/C Ratio=0	G/G Ratio=0	A/A Ratio=0	1	2	40
53	G/G Ratio=0	T/T Ratio=0	A/A Ratio=100.00	C/C Ratio=0	G/G Ratio=0	A/A Ratio=0	1	1	60
54	G/G Ratio=0	T/T Ratio=0	G/A Ratio=49.10	C/C Ratio=0	G/G Ratio=0	A/A Ratio=0	1	2	41
55	G/G Ratio=0	T/G Ratio=47.47	G/G Ratio=0	C/C Ratio=0	G/G Ratio=0	G/G Ratio=100.00	1	2	68
56	G/G Ratio=0	T/T Ratio=0	A/A Ratio=100.00	C/C Ratio=0	G/G Ratio=0	A/A Ratio=0	2	1	52
57	G/G Ratio=0	T/G Ratio=48.98	G/G Ratio=0	C/C Ratio=0	G/G Ratio=0	A/G Ratio=55.39	2	2	58
58	G/G Ratio=0	T/T Ratio=0	A/A Ratio=100.00	C/C Ratio=0	G/G Ratio=0	A/A Ratio=0	2	1	29
59	G/G Ratio=0	T/T Ratio=0	A/A Ratio=100.00	C/C Ratio=0	G/G Ratio=0	A/A Ratio=0	2	2	78
60	G/G Ratio=0	T/T Ratio=0	G/A Ratio=49.26	C/C Ratio=0	G/G Ratio=0	A/G Ratio=58.31	2	2	67
61	G/G Ratio=0	T/G Ratio=53.68	G/A Ratio=48.84	C/C Ratio=0	G/G Ratio=0	A/G Ratio=56.79	2	2	32
62	G/G Ratio=0	T/T Ratio=0	A/A Ratio=100.00	C/C Ratio=0	G/G Ratio=0	A/A Ratio=0	1	1	58
63	G/G Ratio=0	T/T Ratio=0	G/G Ratio=0	T/T Ratio=100.00	C/C Ratio=100.00	G/G Ratio=100.00	1	2	55
64	G/G Ratio=0	T/T Ratio=0	G/A Ratio=44.51	C/T Ratio=48.26	G/C Ratio=54.84	A/G Ratio=64.20	1	2	74
65	G/G Ratio=0	T/G Ratio=50.39	G/A Ratio=42.35	C/C Ratio=0	G/G Ratio=0	A/G Ratio=61.68	2	2	61
66	G/G Ratio=0	T/T Ratio=0	G/A Ratio=48.10	C/T Ratio=46.50	G/C Ratio=40.38	A/G Ratio=51.93	1	2	61
67	G/G Ratio=0	T/T Ratio=0	A/A Ratio=100.00	C/C Ratio=0	G/G Ratio=0	A/A Ratio=0	2	2	41
68	G/G Ratio=0	T/G Ratio=50.17	G/A Ratio=49.30	C/C Ratio=0	G/G Ratio=0	A/G Ratio=57.91	1	1	61
69	G/G Ratio=0	T/T Ratio=0	A/A Ratio=100.00	C/C Ratio=0	G/G Ratio=0	A/A Ratio=0	2	1	30
70	G/G Ratio=0	T/T Ratio=0	G/A Ratio=46.91	C/C Ratio=0	G/G Ratio=0	A/G Ratio=51.23	1	2	65
71	G/G Ratio=0	T/T Ratio=0	A/A Ratio=100.00	C/C Ratio=0	G/G Ratio=0	A/A Ratio=0	1	2	19
72	G/G Ratio=0	T/T Ratio=0	G/A Ratio=48.02	C/C Ratio=0	G/G Ratio=0	A/A Ratio=0	1	1	74
73	G/G Ratio=0	T/G Ratio=45.55	G/A Ratio=51.40	C/C Ratio=0	G/G Ratio=0	A/G Ratio=50.72	1	2	32
74	G/G Ratio=0	T/G Ratio=51.42	G/A Ratio=42.20	C/C Ratio=0	G/G Ratio=0	G/G Ratio=100.00	1	1	69
75	G/G Ratio=0	T/T Ratio=0	G/A Ratio=52.18	C/C Ratio=0	G/C Ratio=50.00	A/G Ratio=58.55		2	63
76	G/G Ratio=0	T/G Ratio=49.07	G/G Ratio=0	C/C Ratio=0	G/G Ratio=0	G/G Ratio=100.00	2	1	58
77	G/G Ratio=0	T/T Ratio=0	G/A Ratio=50.00	C/C Ratio=0	G/G Ratio=0	A/G Ratio=53.99	2	2	61
78	G/G Ratio=0	T/T Ratio=0	A/A Ratio=100.00	C/C Ratio=0	G/G Ratio=0	A/A Ratio=0	1	2	61
79	G/G Ratio=0	T/T Ratio=0	G/G Ratio=0	C/C Ratio=0	G/G Ratio=0	A/G Ratio=62.42	1	1	57
80	G/C Ratio=48.95	T/G Ratio=47.83	G/A Ratio=53.62	C/C Ratio=0	G/C Ratio=56.25	G/G Ratio=100.00	2	2	67
81	G/G Ratio=0	T/T Ratio=0	G/A Ratio=43.30	C/T Ratio=65.48	G/C Ratio=56.98	A/G Ratio=59.64	1	1	54
82	G/G Ratio=0	T/T Ratio=0	A/A Ratio=100.00	C/C Ratio=0	G/G Ratio=0	A/A Ratio=0	1	2	60
83	G/G Ratio=0	T/T Ratio=0	G/A Ratio=43.28	C/T Ratio=51.56	G/C Ratio=52.31	A/A Ratio=0	1	1	75
84	G/G Ratio=0	T/T Ratio=0	G/A Ratio=42.62	C/C Ratio=0	G/G Ratio=0	A/G Ratio=59.71	1	2	76
85	G/C Ratio=50.00	T/T Ratio=0	G/A Ratio=51.90	C/T Ratio=54.35	C/C Ratio=100.00	G/G Ratio=100.00	1	2	74
86	G/G Ratio=0	T/G Ratio=48.44	G/A Ratio=47.79	C/C Ratio=0	G/G Ratio=0	A/G Ratio=56.37	1	2	62
87	G/G Ratio=0	T/G Ratio=50.97	G/A Ratio=46.20	C/C Ratio=0	G/G Ratio=0	A/G Ratio=57.33	2	2	30
88	G/G Ratio=0	T/T Ratio=0	G/A Ratio=47.30	C/T Ratio=58.14	G/C Ratio=52.38	G/G Ratio=100.00		2	70
89	G/G Ratio=0	T/T Ratio=0	A/A Ratio=100.00	C/C Ratio=0	G/G Ratio=0	A/A Ratio=0	1	2	43
90	G/C Ratio=50.57	T/T Ratio=0	A/A Ratio=100.00	C/C Ratio=0	G/C Ratio=54.69	G/G Ratio=100.00	1	2	19
91	G/G Ratio=0	T/G Ratio=54.18	G/A Ratio=40.11	C/C Ratio=0	G/G Ratio=0	A/G Ratio=62.57	2	2	77
92	G/G Ratio=0	T/T Ratio=0	A/A Ratio=100.00	C/C Ratio=0	G/G Ratio=0	A/A Ratio=0	1	2	43
93	G/G Ratio=0	T/G Ratio=50.73	G/A Ratio=44.09	C/C Ratio=0	G/G Ratio=0	A/G Ratio=49.75	1	2	59
94	G/G Ratio=0	T/G Ratio=49.80	G/A Ratio=48.80	C/C Ratio=0	G/G Ratio=0	G/G Ratio=100.00	2	2	50
95	G/G Ratio=0	T/T Ratio=0	A/A Ratio=100.00	C/C Ratio=0	G/C Ratio=51.32	A/G Ratio=57.45	2	2	19
96	G/G Ratio=0	T/T Ratio=0	A/A Ratio=100.00	C/C Ratio=0	G/G Ratio=0	A/A Ratio=0	1	1	59
97	G/G Ratio=0	T/T Ratio=0	G/A Ratio=47.14	C/C Ratio=0	G/G Ratio=0	A/G Ratio=57.14	1	2	69
98	G/C Ratio=50.36	T/T Ratio=0	G/A Ratio=51.35	C/C Ratio=0	G/C Ratio=45.45	A/G Ratio=57.65	2	1	64
99	G/C Ratio=52.64	T/T Ratio=0	G/A Ratio=47.63	C/C Ratio=0	G/C Ratio=51.16	G/G Ratio=100.00	1	2	54
100	G/G Ratio=0	T/T Ratio=0	G/A Ratio=48.81	C/T Ratio=57.63	G/C Ratio=50.48	A/G Ratio=57.14	1	1	59
101	G/C Ratio=50.08	T/T Ratio=0	A/A Ratio=100.00	C/C Ratio=0	G/C Ratio=46.56	A/G Ratio=54.32	1	2	73
102	G/G Ratio=0	T/T Ratio=0	A/A Ratio=100.00	C/C Ratio=0	G/G Ratio=0	A/A Ratio=0	2	2	35
103	C/C Ratio=100.00	T/T Ratio=0	A/A Ratio=100.00	C/C Ratio=0	C/C Ratio=100.00	G/G Ratio=100.00	2	2	43
104	G/C Ratio=50.45	T/T Ratio=0	A/A Ratio=100.00	C/C Ratio=0	G/G Ratio=0	A/A Ratio=0	1	2	54
105	G/G Ratio=0	T/T Ratio=0	A/A Ratio=100.00	C/C Ratio=0	G/G Ratio=0	A/A Ratio=0	1	2	29
106	G/G Ratio=0	T/G Ratio=50.20	G/A Ratio=48.39	C/C Ratio=0	G/G Ratio=0	A/G Ratio=51.46	1	1	50
107	G/G Ratio=0	T/T Ratio=0	G/A Ratio=50.69	C/T Ratio=51.12	G/C Ratio=52.38	A/A Ratio=0	2	2	65
108	G/G Ratio=0	T/G Ratio=49.63	G/A Ratio=51.53	C/C Ratio=0	G/G Ratio=0	A/G Ratio=52.89	1	2	40
109	G/G Ratio=0	T/G Ratio=49.14	G/A Ratio=50.00	C/C Ratio=0	G/G Ratio=0	A/G Ratio=49.93	1	1	64
110	G/G Ratio=0	T/T Ratio=0	A/A Ratio=100.00	C/C Ratio=0	G/G Ratio=0	A/A Ratio=0	1	2	54
111	G/G Ratio=0	T/G Ratio=49.12	G/A Ratio=48.13	C/C Ratio=0	G/G Ratio=0	A/G Ratio=55.91	1	2	30
112	G/G Ratio=0	T/G Ratio=48.19	G/G Ratio=0	C/C Ratio=0	G/G Ratio=0	A/G Ratio=57.43	2	1	39
113	G/G Ratio=0	T/G Ratio=48.53	G/A Ratio=49.72	C/C Ratio=0	G/G Ratio=0	A/G Ratio=54.68	1	2	69
114	G/G Ratio=0	T/T Ratio=0	A/A Ratio=100.00	C/C Ratio=0	G/G Ratio=0	A/A Ratio=0	2	2	75
115	G/G Ratio=0	T/T Ratio=0	G/A Ratio=50.68	C/T Ratio=56.81	G/C Ratio=54.40	G/G Ratio=100.00	1	2	53
116	G/G Ratio=0	T/G Ratio=49.16	G/A Ratio=45.18	C/C Ratio=0	G/G Ratio=0	A/G Ratio=58.94	1	2	33
117	G/G Ratio=0	T/T Ratio=0	G/A Ratio=51.98	C/C Ratio=0	G/G Ratio=0	A/G Ratio=51.36	2	1	54
118	G/G Ratio=0	T/T Ratio=0	G/A Ratio=46.28	C/C Ratio=0	G/G Ratio=0	A/A Ratio=0	1	2	75
119	G/G Ratio=0	T/G Ratio=52.51	G/A Ratio=44.50	C/C Ratio=0	G/G Ratio=0	A/G Ratio=62.16	1	1	51
120	G/G Ratio=0	T/T Ratio=0	A/A Ratio=100.00	C/C Ratio=0	G/G Ratio=0	A/A Ratio=0	1	2	49
121	G/G Ratio=0	T/G Ratio=48.09	G/A Ratio=48.86	C/C Ratio=0	G/G Ratio=0	A/G Ratio=56.68	2	1	58
122	G/G Ratio=0	T/G Ratio=50.23	G/A Ratio=51.93	C/C Ratio=0	G/G Ratio=0	A/G Ratio=56.18	2	2	36
123	G/G Ratio=0	T/G Ratio=48.80	G/A Ratio=49.52	C/C Ratio=0	G/G Ratio=0	A/G Ratio=56.77	1	1	67
124	G/G Ratio=0	T/T Ratio=0	G/A Ratio=50.25	C/C Ratio=0	G/G Ratio=0	A/A Ratio=0	1	2	72
125	G/G Ratio=0	T/G Ratio=47.12	G/A Ratio=47.19	C/C Ratio=0	G/G Ratio=0	A/G Ratio=58.73	1	2	63
126	G/G Ratio=0	T/G Ratio=47.06	G/G Ratio=0	C/T Ratio=49.07	G/C Ratio=52.07	G/G Ratio=100.00	2	1	42
127	G/G Ratio=0	T/T Ratio=0	A/A Ratio=100.00	C/C Ratio=0	G/G Ratio=0	A/A Ratio=0	1	2	33
128	G/G Ratio=0	T/T Ratio=0	A/A Ratio=100.00	C/C Ratio=0	G/G Ratio=0	A/A Ratio=0	1	2	63
129	G/G Ratio=0	T/T Ratio=0	A/A Ratio=100.00	C/C Ratio=0	G/G Ratio=0	A/A Ratio=0	2	1	47
130	G/C Ratio=47.09	T/G Ratio=48.44	G/A Ratio=52.22	C/C Ratio=0	G/C Ratio=62.50	G/G Ratio=100.00	2	2	60
131	G/G Ratio=0	T/T Ratio=0	G/A Ratio=39.84	C/C Ratio=0	G/G Ratio=0	A/G Ratio=62.10	2	1	64
132	G/G Ratio=0	T/G Ratio=52.72	G/A Ratio=53.64	C/C Ratio=0	G/G Ratio=0	A/G Ratio=50.50	2	1	63
133	G/G Ratio=0	T/T Ratio=0	G/A Ratio=47.29	C/T Ratio=52.48	G/C Ratio=51.74	A/G Ratio=60.64	2	1	76
134	G/G Ratio=0	T/T Ratio=0	A/A Ratio=100.00	C/C Ratio=0	G/G Ratio=0	A/A Ratio=0	1	2	63
135	G/G Ratio=0	T/T Ratio=0	G/G Ratio=0	T/T Ratio=100.00	C/C Ratio=100.00	G/G Ratio=100.00	1	2	63
136	G/G Ratio=0	T/T Ratio=0	A/A Ratio=100.00	C/C Ratio=0	G/G Ratio=0	A/A Ratio=0	1	2	69
137	G/C Ratio=50.49	T/T Ratio=0	A/A Ratio=100.00	C/C Ratio=0	G/C Ratio=53.01	A/G Ratio=57.22	2	2	48
138	G/G Ratio=0	T/G Ratio=51.76	G/A Ratio=42.72	C/C Ratio=0	G/G Ratio=0	A/G Ratio=55.46	1	2	56
139	G/G Ratio=0	T/T Ratio=0	G/A Ratio=43.21	C/T Ratio=52.88	G/C Ratio=49.57	A/G Ratio=60.44	1	1	50
140	G/G Ratio=0	T/T Ratio=0	G/A Ratio=46.27	C/T Ratio=62.39	G/C Ratio=51.79	A/G Ratio=50.82	1	2	67
141	G/G Ratio=0	NA/NA	NA/NA	NA/NA	NA/NA	NA/NA	1	2	64
142	G/G Ratio=0	T/T Ratio=0	A/A Ratio=100.00	C/C Ratio=0	G/G Ratio=0	A/A Ratio=0	1	1	61
143	G/C Ratio=50.82	T/T Ratio=0	A/A Ratio=100.00	C/C Ratio=0	G/G Ratio=0	A/G Ratio=56.78	1	1	73
144	G/G Ratio=0	T/T Ratio=0	A/A Ratio=100.00	C/C Ratio=0	G/G Ratio=0	A/A Ratio=0	2	1	71
145	G/G Ratio=0	G/G Ratio=100.00	G/G Ratio=0	C/C Ratio=0	G/G Ratio=0	G/G Ratio=100.00	2	2	30
146	G/G Ratio=0	T/G Ratio=48.38	G/G Ratio=0	C/C Ratio=0	G/G Ratio=0	G/G Ratio=100.00	2	2	65
147	G/C Ratio=49.88	T/T Ratio=0	G/A Ratio=52.52	C/C Ratio=0	G/C Ratio=48.57	G/G Ratio=100.00	1	1	74
148	G/G Ratio=0	T/T Ratio=0	A/A Ratio=100.00	C/C Ratio=0	G/G Ratio=0	A/A Ratio=0	2	2	21
149	G/G Ratio=0	T/G Ratio=50.84	G/A Ratio=49.26	C/C Ratio=0	G/G Ratio=0	A/G Ratio=48.00	2	2	69
150	G/C Ratio=49.26	T/G Ratio=50.07	G/A Ratio=50.31	C/C Ratio=0	G/C Ratio=53.06	G/G Ratio=100.00	1	2	58
151	G/C Ratio=50.44	T/G Ratio=48.00	G/A Ratio=53.16	C/C Ratio=0	G/C Ratio=52.05	G/G Ratio=100.00	2	2	62
152	G/G Ratio=0	T/T Ratio=0	G/A Ratio=41.99	C/T Ratio=58.99	G/C Ratio=58.82	A/G Ratio=57.56	2	1	53
153	G/G Ratio=0	G/G Ratio=100.00	G/G Ratio=0	C/C Ratio=0	G/G Ratio=0	G/G Ratio=100.00	1	1	70
154	G/G Ratio=0	T/T Ratio=0	A/A Ratio=100.00	C/C Ratio=0	G/G Ratio=0	A/A Ratio=0	2	1	53
155	G/G Ratio=0	T/G Ratio=49.94	G/A Ratio=51.44	C/C Ratio=0	G/G Ratio=0	A/G Ratio=53.27	1	2	64
156	G/G Ratio=0	T/G Ratio=51.10	G/A Ratio=40.96	C/C Ratio=0	G/G Ratio=0	A/G Ratio=56.08	2	1	56
157	G/C Ratio=47.23	T/G Ratio=46.16	G/A Ratio=58.36	C/C Ratio=0	G/C Ratio=59.52	G/G Ratio=100.00	2	2	44
158	G/G Ratio=0	T/T Ratio=0	A/A Ratio=100.00	C/C Ratio=0	G/G Ratio=0	A/A Ratio=0	1	2	47
159	G/G Ratio=0	T/T Ratio=0	A/A Ratio=100.00	C/C Ratio=0	G/G Ratio=0	A/A Ratio=0	1	2	62
160	G/G Ratio=0	T/G Ratio=45.96	G/A Ratio=54.28	C/C Ratio=0	G/G Ratio=0	A/G Ratio=45.54	1	2	62
161	G/G Ratio=0	T/T Ratio=0	A/A Ratio=100.00	C/C Ratio=0	G/G Ratio=0	A/A Ratio=0	1	2	68
162	G/G Ratio=0	T/T Ratio=0	G/A Ratio=44.60	C/T Ratio=50.00	G/C Ratio=50.00	A/A Ratio=0	1	1	51
163	G/G Ratio=0	T/G Ratio=51.17	G/A Ratio=53.40	C/C Ratio=0	G/G Ratio=0	A/G Ratio=55.18	1	2	62
164	G/G Ratio=0	T/T Ratio=0	A/A Ratio=100.00	C/C Ratio=0	G/G Ratio=0	A/A Ratio=0	1	1	64
165	G/G Ratio=0	T/T Ratio=0	A/A Ratio=100.00	C/C Ratio=0	G/G Ratio=0	A/A Ratio=0	1	2	75
166	G/G Ratio=0	T/G Ratio=48.38	G/G Ratio=0	C/T Ratio=51.56	G/C Ratio=55.17	G/G Ratio=100.00	1	1	61
167	G/G Ratio=0	T/T Ratio=0	G/A Ratio=42.46	C/C Ratio=0	G/G Ratio=0	A/G Ratio=58.73	1	2	60
168	G/C Ratio=51.02	T/T Ratio=0	A/A Ratio=100.00	C/C Ratio=0	G/G Ratio=0	A/G Ratio=54.79	1	1	60
169	G/G Ratio=0	G/G Ratio=100.00	G/G Ratio=0	C/C Ratio=0	G/G Ratio=0	G/G Ratio=100.00	1	2	62
170	G/C Ratio=49.70	T/G Ratio=48.24	G/A Ratio=50.43	C/C Ratio=0	G/G Ratio=0	G/G Ratio=100.00	2	2	55
171	G/G Ratio=0	G/G Ratio=100.00	G/G Ratio=0	C/C Ratio=0	G/G Ratio=0	G/G Ratio=100.00	1	1	67
172	G/G Ratio=0	T/T Ratio=0	A/A Ratio=100.00	C/C Ratio=0	G/G Ratio=0	A/A Ratio=0	2	2	48
173	G/G Ratio=0	T/G Ratio=50.46	G/A Ratio=48.17	C/C Ratio=0	G/G Ratio=0	A/G Ratio=60.04	1	1	59
174	G/G Ratio=0	T/G Ratio=48.12	G/A Ratio=49.24	C/C Ratio=0	G/G Ratio=0	A/G Ratio=54.71	2	1	40
175	G/G Ratio=0	T/T Ratio=0	G/G Ratio=0	C/C Ratio=0	G/G Ratio=0	A/A Ratio=0	1	2	61
176	G/C Ratio=52.76	T/G Ratio=47.96	G/A Ratio=51.60	C/C Ratio=0	G/C Ratio=52.83	G/G Ratio=100.00	1	1	66
177	G/G Ratio=0	T/T Ratio=0	A/A Ratio=100.00	C/C Ratio=0	G/G Ratio=0	A/A Ratio=0	1	2	45
178	G/G Ratio=0	T/T Ratio=0	A/A Ratio=100.00	C/C Ratio=0	G/G Ratio=0	A/A Ratio=0	1	1	47
179	G/G Ratio=0	T/T Ratio=0	A/A Ratio=100.00	C/C Ratio=0	G/G Ratio=0	A/A Ratio=0	1	2	46
180	G/C Ratio=52.05	T/T Ratio=0	G/A Ratio=48.27	C/T Ratio=57.84	C/C Ratio=100.00	G/G Ratio=100.00	1	1	63
181	G/G Ratio=0	T/T Ratio=0	G/A Ratio=43.60	C/C Ratio=0	G/G Ratio=0	A/G Ratio=64.98	2	1	48
182	G/G Ratio=0	T/T Ratio=0	G/A Ratio=49.42	C/C Ratio=0	G/G Ratio=0	A/G Ratio=56.14	1	2	59
183	G/G Ratio=0	T/T Ratio=0	A/A Ratio=100.00	C/C Ratio=0	G/G Ratio=0	A/A Ratio=0	2	2	52
184	G/G Ratio=0	T/T Ratio=0	G/A Ratio=48.87	C/T Ratio=51.72	G/C Ratio=52.83	A/A Ratio=0	2	2	56
185	G/C Ratio=50.94	T/G Ratio=50.89	G/A Ratio=49.33	C/C Ratio=0	G/C Ratio=40.00	G/G Ratio=100.00	2	2	56
186	G/G Ratio=0	T/T Ratio=0	G/A Ratio=48.06	C/T Ratio=58.92	G/C Ratio=50.44	A/G Ratio=52.08	1	2	59
187	G/G Ratio=0	T/G Ratio=50.00	G/G Ratio=0	C/T Ratio=55.80	G/C Ratio=53.85	G/G Ratio=100.00	1	2	53
188	G/G Ratio=0	T/T Ratio=0	G/A Ratio=54.50	C/T Ratio=52.78	G/C Ratio=47.50	A/A Ratio=0	1	1	64
189	G/G Ratio=0	T/T Ratio=0	A/A Ratio=100.00	C/C Ratio=0	G/G Ratio=0	A/A Ratio=0	2	2	67
190	G/G Ratio=0	T/T Ratio=0	G/A Ratio=40.43	C/T Ratio=57.14	G/C Ratio=52.45	A/G Ratio=61.71	1	1	65
191	G/G Ratio=0	T/T Ratio=0	A/A Ratio=100.00	C/C Ratio=0	G/G Ratio=0	A/A Ratio=0	1	2	68
192	G/G Ratio=0	T/T Ratio=0	G/A Ratio=50.93	C/C Ratio=0	G/G Ratio=0	A/G Ratio=65.54	2	2	66
193	G/G Ratio=0	T/T Ratio=0	G/A Ratio=52.50	C/T Ratio=37.78	G/C Ratio=32.29	A/G Ratio=51.91	1	1	72
194	G/C Ratio=50.22	T/G Ratio=49.06	G/A Ratio=45.51	C/C Ratio=0	G/C Ratio=44.44	G/G Ratio=100.00	1	1	72
195	G/G Ratio=0	T/T Ratio=0	A/A Ratio=100.00	C/C Ratio=0	G/G Ratio=0	A/A Ratio=0	1	1	64
196	G/G Ratio=0	T/T Ratio=0	G/A Ratio=34.78	C/C Ratio=0	G/G Ratio=0	A/G Ratio=58.83	1	2	19
197	G/G Ratio=0	T/G Ratio=49.09	G/A Ratio=46.21	C/C Ratio=0	G/G Ratio=0	A/G Ratio=59.44	1	2	51
198	G/G Ratio=0	T/T Ratio=0	A/A Ratio=100.00	C/C Ratio=0	G/G Ratio=0	A/A Ratio=0	1	1	66
199	G/C Ratio=49.33	T/T Ratio=0	G/A Ratio=46.15	C/C Ratio=0	G/C Ratio=43.52	G/G Ratio=100.00	1	2	65
200	G/G Ratio=0	T/T Ratio=0	G/A Ratio=50.00	C/T Ratio=51.48	G/C Ratio=43.62	A/G Ratio=54.04	2	2	18
201	G/G Ratio=0	T/T Ratio=0	G/G Ratio=0	C/T Ratio=33.52	G/G Ratio=0	A/G Ratio=68.72	1	2	51
202	G/G Ratio=0	T/G Ratio=50.64	G/G Ratio=0	C/C Ratio=0	G/G Ratio=0	A/G Ratio=54.75	1	1	65
203	G/C Ratio=50.52	T/T Ratio=0	A/A Ratio=100.00	C/C Ratio=0	G/G Ratio=0	A/G Ratio=50.00	2	2	66
204	G/G Ratio=0	T/G Ratio=48.67	G/A Ratio=49.56	C/C Ratio=0	G/G Ratio=0	A/G Ratio=59.07	2	2	74
205	G/G Ratio=0	T/G Ratio=50.25	G/A Ratio=48.76	C/C Ratio=0	G/G Ratio=0	A/A Ratio=0	1	2	71
206	G/C Ratio=48.00	T/G Ratio=47.43	G/A Ratio=53.91	C/C Ratio=0	G/C Ratio=55.08	G/G Ratio=100.00	2	2	53
207	G/G Ratio=0	T/T Ratio=0	A/A Ratio=100.00	C/C Ratio=0	G/G Ratio=0	A/A Ratio=0	2	2	69
208	G/G Ratio=0	T/G Ratio=46.40	G/A Ratio=50.42	C/C Ratio=0	G/G Ratio=0	A/G Ratio=52.77	2	2	41

## Sheet: ULK1 Control group
	rs10902469	rs12303764	rs4964879	rs7300908	rs7138581	rs9481
	ULK1	ULK1	ULK1	ULK1	ULK1	ULK1
	12	12	12	12	12	12
	132378133	132399065	132400309	132405421	132406666	132407089
	132378133	132399065	132400309	132405421	132406666	132407089
	G	T	G	C	G	A	gender (1=male, 2=female)	age
1	G/G Ratio=0	T/T Ratio=0	G/A Ratio=66.57	C/C Ratio=0	G/G Ratio=0	A/A Ratio=0	1	70
2	G/G Ratio=0	G/G Ratio=100.00	G/G Ratio=0	C/C Ratio=0	G/G Ratio=0	G/G Ratio=100.00	1	81
3	G/G Ratio=0	T/T Ratio=0	G/A Ratio=39.29	C/T Ratio=52.85	G/C Ratio=40.10	A/G Ratio=60.31	2	48
4	G/G Ratio=0	T/T Ratio=0	G/A Ratio=43.90	C/T Ratio=50.72	G/C Ratio=46.59	A/G Ratio=54.81	2	60
5	G/G Ratio=0	T/T Ratio=0	A/A Ratio=100.00	C/C Ratio=0	G/G Ratio=0	A/G Ratio=53.36	2	68
6	G/G Ratio=0	T/G Ratio=51.22	G/A Ratio=52.25	C/C Ratio=0	G/G Ratio=0	A/G Ratio=59.83	2	61
7	G/G Ratio=0	T/G Ratio=54.17	G/G Ratio=0	C/C Ratio=0	G/G Ratio=0	G/G Ratio=100.00	2	54
8	G/G Ratio=0	T/T Ratio=0	A/A Ratio=100.00	C/C Ratio=0	G/G Ratio=0	A/A Ratio=0	2	77
9	G/G Ratio=0	T/T Ratio=0	G/A Ratio=53.14	C/T Ratio=48.93	G/C Ratio=43.72	A/G Ratio=56.42	1	73
10	G/G Ratio=0	T/T Ratio=0	A/A Ratio=100.00	C/C Ratio=0	G/G Ratio=0	A/A Ratio=0	2	81
11	G/G Ratio=0	T/T Ratio=0	A/A Ratio=100.00	C/C Ratio=0	G/G Ratio=0	A/A Ratio=0	1	63
12	G/G Ratio=0	G/G Ratio=100.00	G/G Ratio=0	C/C Ratio=0	G/G Ratio=0	G/G Ratio=100.00	2	50
13	G/G Ratio=0	T/T Ratio=0	G/A Ratio=45.94	C/C Ratio=0	G/G Ratio=0	A/G Ratio=57.94	2	33
14	G/G Ratio=0	T/T Ratio=0	A/A Ratio=100.00	C/C Ratio=0	G/G Ratio=0	A/A Ratio=0	2	19
15	G/G Ratio=0	T/G Ratio=51.92	G/A Ratio=41.49	C/C Ratio=0	G/G Ratio=0	A/G Ratio=53.33	1	54
16	G/G Ratio=0	T/T Ratio=0	A/A Ratio=100.00	C/C Ratio=0	G/G Ratio=0	A/A Ratio=0	2	54
17	G/G Ratio=0	T/T Ratio=0	G/A Ratio=49.59	C/C Ratio=0	G/G Ratio=0	A/G Ratio=51.47	2	35
18	G/G Ratio=0	T/T Ratio=0	G/A Ratio=44.78	C/T Ratio=55.72	G/C Ratio=47.48	A/A Ratio=0	2	55
19	G/G Ratio=0	T/T Ratio=0	G/A Ratio=47.41	C/T Ratio=57.56	G/C Ratio=44.19	A/G Ratio=64.53	2	72
20	G/C Ratio=50.95	T/T Ratio=0	A/A Ratio=100.00	C/C Ratio=0	G/C Ratio=54.72	A/G Ratio=61.86	1	77
21	G/G Ratio=0	T/G Ratio=48.52	G/A Ratio=52.44	C/C Ratio=0	G/G Ratio=0	A/G Ratio=58.82	2	70
22	G/G Ratio=0	T/T Ratio=0	A/A Ratio=100.00	C/C Ratio=0	G/G Ratio=0	A/A Ratio=0	2	35
23	G/G Ratio=0	T/G Ratio=31.07	G/A Ratio=62.02	C/C Ratio=0	G/G Ratio=0	A/G Ratio=41.67	1	25
24	G/C Ratio=48.06	T/T Ratio=0	A/A Ratio=100.00	C/C Ratio=0	G/C Ratio=50.34	A/G Ratio=61.15	2	38
25	G/G Ratio=0	T/G Ratio=44.53	G/A Ratio=57.50	C/C Ratio=0	G/G Ratio=0	A/G Ratio=52.76	1	69
26	G/G Ratio=0	T/T Ratio=0	A/A Ratio=100.00	C/C Ratio=0	G/G Ratio=0	A/A Ratio=0	2	42
27	G/G Ratio=0	T/G Ratio=44.01	G/G Ratio=0	C/C Ratio=0	G/G Ratio=0	A/A Ratio=0	1	51
28	G/G Ratio=0	T/G Ratio=44.83	G/G Ratio=0	C/T Ratio=50.92	G/C Ratio=50.41	G/G Ratio=100.00	2	74
29	G/G Ratio=0	T/G Ratio=47.94	G/A Ratio=52.89	C/C Ratio=0	G/G Ratio=0	A/G Ratio=60.34	2	44
30	G/G Ratio=0	T/T Ratio=0	A/A Ratio=100.00	C/C Ratio=0	G/G Ratio=0	A/A Ratio=0	2	51
31	G/G Ratio=0	T/T Ratio=0	G/A Ratio=46.81	C/T Ratio=43.61	G/C Ratio=40.45	A/A Ratio=0	2	56
32	G/G Ratio=0	T/T Ratio=0	A/A Ratio=100.00	C/C Ratio=0	G/G Ratio=0	A/A Ratio=0	2	42
33	G/G Ratio=0	T/T Ratio=0	A/A Ratio=100.00	C/C Ratio=0	G/G Ratio=0	A/A Ratio=0	2	31
34	G/G Ratio=0	T/T Ratio=0	A/A Ratio=100.00	C/C Ratio=0	G/G Ratio=0	A/A Ratio=0	2	56
35	G/G Ratio=0	T/G Ratio=53.66	G/A Ratio=47.14	C/C Ratio=0	G/G Ratio=0	A/G Ratio=60.49	2	47
36	G/G Ratio=0	T/T Ratio=0	G/A Ratio=43.60	C/T Ratio=58.12	G/C Ratio=50.40	A/A Ratio=0	1	57
37	G/G Ratio=0	T/T Ratio=0	G/G Ratio=0	C/C Ratio=0	G/C Ratio=54.27	G/G Ratio=100.00	1	47
38	G/G Ratio=0	T/T Ratio=0	G/A Ratio=56.52	C/T Ratio=37.63	G/C Ratio=47.76	A/G Ratio=56.65	1	68
39	G/G Ratio=0	T/T Ratio=0	A/A Ratio=100.00	C/C Ratio=0	G/G Ratio=0	A/A Ratio=0	2	38
40	G/G Ratio=0	T/T Ratio=0	A/A Ratio=100.00	C/C Ratio=0	G/G Ratio=0	A/A Ratio=0	1	45
41	G/G Ratio=0	T/T Ratio=0	A/A Ratio=100.00	C/C Ratio=0	G/G Ratio=0	A/A Ratio=0	1	64
42	G/G Ratio=0	T/T Ratio=0	G/A Ratio=51.61	C/T Ratio=54.42	G/C Ratio=45.49	A/A Ratio=0	1	61
43	G/G Ratio=0	T/T Ratio=0	A/A Ratio=100.00	C/C Ratio=0	G/G Ratio=0	A/A Ratio=0	1	26
44	G/G Ratio=0	T/G Ratio=46.19	G/G Ratio=0	C/T Ratio=52.63	G/C Ratio=49.15	G/G Ratio=100.00	1	68
45	G/C Ratio=48.62	T/T Ratio=0	A/A Ratio=100.00	C/C Ratio=0	G/C Ratio=45.83	A/G Ratio=51.04	1	47
46	G/C Ratio=43.69	T/T Ratio=0	A/A Ratio=100.00	C/C Ratio=0	G/C Ratio=50.48	A/G Ratio=59.71	2	47
47	G/G Ratio=0	T/T Ratio=0	A/A Ratio=100.00	C/C Ratio=0	G/G Ratio=0	A/A Ratio=0	1	60
48	G/G Ratio=0	T/G Ratio=48.55	G/A Ratio=48.55	C/C Ratio=0	G/G Ratio=0	A/G Ratio=55.97	2	30
49	G/C Ratio=48.77	T/T Ratio=0	A/A Ratio=100.00	C/C Ratio=0	G/C Ratio=59.18	A/G Ratio=62.35	2	54
50	G/G Ratio=0	T/G Ratio=45.03	G/A Ratio=54.05	C/C Ratio=0	G/G Ratio=0	A/G Ratio=58.90	1	35
51	G/G Ratio=0	T/G Ratio=48.49	G/A Ratio=54.03	C/C Ratio=0	G/G Ratio=0	A/G Ratio=54.40	1	79
52	G/C Ratio=51.26	T/T Ratio=0	A/A Ratio=100.00	C/C Ratio=0	G/C Ratio=53.31	A/G Ratio=52.61	1	52
53	G/G Ratio=0	T/T Ratio=0	A/A Ratio=100.00	C/C Ratio=0	G/G Ratio=0	A/A Ratio=0	2	70
54	G/G Ratio=0	T/T Ratio=0	G/A Ratio=36.15	C/C Ratio=0	G/G Ratio=0	A/G Ratio=61.98	1	60
55	G/G Ratio=0	T/G Ratio=48.54	G/A Ratio=55.10	C/C Ratio=0	G/G Ratio=0	A/G Ratio=52.67	1	39
56	G/G Ratio=0	T/T Ratio=0	A/A Ratio=100.00	C/C Ratio=0	G/G Ratio=0	A/A Ratio=0	2	61
57	G/G Ratio=0	T/G Ratio=46.71	G/A Ratio=49.17	C/C Ratio=0	G/G Ratio=0	A/G Ratio=53.74	2	49
58	G/G Ratio=0	T/T Ratio=0	G/A Ratio=46.06	C/T Ratio=53.88	G/C Ratio=49.47	A/G Ratio=57.59	2	45
59	G/C Ratio=50.14	T/T Ratio=0	A/A Ratio=100.00	C/C Ratio=0	G/C Ratio=67.77	A/G Ratio=62.75	1	46
60	G/G Ratio=0	T/G Ratio=45.24	G/A Ratio=54.58	C/C Ratio=0	G/G Ratio=0	A/G Ratio=56.04	2	39
61	G/C Ratio=49.70	T/G Ratio=46.88	G/A Ratio=53.75	C/C Ratio=0	G/C Ratio=45.40	G/G Ratio=100.00	1	50
62	G/C Ratio=49.15	T/T Ratio=0	A/A Ratio=100.00	C/C Ratio=0	G/C Ratio=49.48	A/G Ratio=62.74	2	48
63	G/G Ratio=0	T/T Ratio=0	G/A Ratio=43.03	C/T Ratio=51.44	G/C Ratio=51.85	A/G Ratio=63.90	1	18
64	G/C Ratio=51.19	T/T Ratio=0	G/A Ratio=45.21	C/T Ratio=48.18	C/C Ratio=100.00	G/G Ratio=100.00	2	35
65	G/G Ratio=0	T/G Ratio=42.09	G/A Ratio=60.91	C/C Ratio=0	G/G Ratio=0	A/G Ratio=54.11	1	56
66	G/C Ratio=49.60	T/T Ratio=0	A/A Ratio=100.00	C/C Ratio=0	G/C Ratio=57.61	A/G Ratio=58.55	1	81
67	G/G Ratio=0	T/T Ratio=0	G/A Ratio=42.50	C/T Ratio=54.40	G/C Ratio=45.21	A/A Ratio=0	2	34
68	G/G Ratio=0	T/T Ratio=0	G/G Ratio=0	C/T Ratio=51.96	G/C Ratio=54.76	G/G Ratio=100.00	2	55
69	G/G Ratio=0	T/T Ratio=0	G/A Ratio=43.52	C/C Ratio=0	G/G Ratio=0	A/G Ratio=60.32	2	45
70	G/G Ratio=0	T/G Ratio=50.81	G/A Ratio=42.50	C/C Ratio=0	G/G Ratio=0	A/G Ratio=53.25	1	33
71	G/G Ratio=0	T/T Ratio=0	G/A Ratio=46.67	C/C Ratio=0	G/G Ratio=0	A/G Ratio=60.70	2	39
72	G/G Ratio=0	T/G Ratio=44.65	G/A Ratio=57.17	C/C Ratio=0	G/G Ratio=0	A/A Ratio=0	2	36
73	G/C Ratio=46.84	T/T Ratio=0	A/A Ratio=100.00	C/C Ratio=0	G/C Ratio=53.95	A/G Ratio=49.79	1	40
74	G/G Ratio=0	T/T Ratio=0	A/A Ratio=100.00	C/C Ratio=0	G/G Ratio=0	A/A Ratio=0	1	27
75	G/G Ratio=0	T/G Ratio=50.06	G/A Ratio=47.09	C/C Ratio=0	G/G Ratio=0	A/G Ratio=55.72	1	52
76	G/G Ratio=0	T/T Ratio=0	A/A Ratio=100.00	C/C Ratio=0	G/G Ratio=0	A/A Ratio=0	2	21
77	G/G Ratio=0	G/G Ratio=100.00	G/G Ratio=0	C/C Ratio=0	G/G Ratio=0	A/G Ratio=53.93	1	19
78	G/G Ratio=0	T/T Ratio=0	A/A Ratio=100.00	C/C Ratio=0	G/G Ratio=0	A/G Ratio=50.13	2	40
79	G/G Ratio=0	T/T Ratio=0	A/A Ratio=100.00	C/C Ratio=0	G/G Ratio=0	A/A Ratio=0	1	35
80	G/G Ratio=0	T/G Ratio=50.32	G/G Ratio=0	C/T Ratio=48.85	G/C Ratio=50.40	G/G Ratio=100.00	1	70
81	G/G Ratio=0	T/T Ratio=0	A/A Ratio=100.00	C/C Ratio=0	G/G Ratio=0	A/A Ratio=0	2	18
82	G/C Ratio=47.19	T/T Ratio=0	A/A Ratio=100.00	C/C Ratio=0	G/C Ratio=60.92	A/G Ratio=59.30	2	46
83	G/G Ratio=0	T/T Ratio=0	G/A Ratio=42.04	C/T Ratio=54.69	G/C Ratio=51.96	A/G Ratio=60.00	2	66
84	G/G Ratio=0	T/T Ratio=0	A/A Ratio=100.00	C/C Ratio=0	G/G Ratio=0	A/A Ratio=0	2	81
85	G/C Ratio=49.78	T/T Ratio=0	A/A Ratio=100.00	C/C Ratio=0	G/C Ratio=54.17	A/G Ratio=61.48	2	52
86	G/G Ratio=0	T/T Ratio=0	G/G Ratio=0	C/T Ratio=54.14	G/C Ratio=55.00	G/G Ratio=100.00	2	65
87	G/G Ratio=0	T/G Ratio=47.17	G/G Ratio=0	C/C Ratio=0	G/G Ratio=0	G/G Ratio=100.00	2	41
88	G/G Ratio=0	T/G Ratio=48.88	G/A Ratio=54.90	C/C Ratio=0	G/G Ratio=0	A/A Ratio=0	2	70
89	G/G Ratio=0	T/T Ratio=0	A/A Ratio=100.00	C/C Ratio=0	G/G Ratio=0	A/G Ratio=53.74	2	71
90	G/G Ratio=0	T/T Ratio=0	G/A Ratio=55.32	C/C Ratio=0	G/G Ratio=0	A/G Ratio=56.47	2	52
91	G/G Ratio=0	T/T Ratio=0	A/A Ratio=100.00	C/C Ratio=0	G/G Ratio=0	A/A Ratio=0	2	44
92	G/G Ratio=0	T/G Ratio=41.21	G/A Ratio=57.14	C/C Ratio=0	G/G Ratio=0	A/G Ratio=50.79	2	76
93	G/G Ratio=0	T/T Ratio=0	A/A Ratio=100.00	C/C Ratio=0	G/G Ratio=0	A/A Ratio=0	2	47
94	G/C Ratio=50.63	T/T Ratio=0	G/A Ratio=40.74	C/C Ratio=0	C/C Ratio=100.00	G/G Ratio=100.00	1	59
95	G/G Ratio=0	T/G Ratio=49.63	G/A Ratio=50.64	C/C Ratio=0	G/G Ratio=0	A/G Ratio=53.56	1	51
96	G/G Ratio=0	T/T Ratio=0	A/A Ratio=100.00	C/C Ratio=0	G/G Ratio=0	A/A Ratio=0	2	64
97	G/G Ratio=0	T/G Ratio=49.22	G/A Ratio=47.90	C/C Ratio=0	G/G Ratio=0	A/G Ratio=59.14	2	37
98	G/G Ratio=0	T/T Ratio=0	A/A Ratio=100.00	C/C Ratio=0	G/G Ratio=0	A/A Ratio=0	1	65
99	G/G Ratio=0	T/T Ratio=0	A/A Ratio=100.00	C/C Ratio=0	G/G Ratio=0	A/A Ratio=0	2	38
100	G/G Ratio=0	T/T Ratio=0	G/G Ratio=0	C/T Ratio=49.23	G/C Ratio=49.66	G/G Ratio=100.00	2	45
101	G/G Ratio=0	T/T Ratio=0	A/A Ratio=100.00	C/C Ratio=0	G/G Ratio=0	A/A Ratio=0	2	51
102	G/G Ratio=0	T/T Ratio=0	A/A Ratio=100.00	C/C Ratio=0	G/G Ratio=0	A/A Ratio=0	2	43
103	G/G Ratio=0	T/T Ratio=0	A/A Ratio=100.00	C/C Ratio=0	G/G Ratio=0	A/A Ratio=0	2	58
104	G/G Ratio=0	T/G Ratio=49.17	G/G Ratio=0	C/C Ratio=0	G/G Ratio=0	G/G Ratio=100.00	2	51
105	G/G Ratio=0	T/G Ratio=48.59	G/A Ratio=44.89	C/C Ratio=0	G/G Ratio=0	A/G Ratio=56.84	2	64
106	G/G Ratio=0	T/T Ratio=0	A/A Ratio=100.00	C/C Ratio=0	G/G Ratio=0	A/A Ratio=0	2	51
107	G/G Ratio=0	T/T Ratio=0	A/A Ratio=100.00	C/C Ratio=0	G/G Ratio=0	A/A Ratio=0	2	47
108	G/G Ratio=0	T/T Ratio=0	A/A Ratio=100.00	C/C Ratio=0	G/G Ratio=0	A/G Ratio=54.52	2	67
109	G/G Ratio=0	T/G Ratio=50.18	G/A Ratio=46.51	C/C Ratio=0	G/G Ratio=0	A/G Ratio=57.96	2	41
110	G/G Ratio=0	T/G Ratio=49.36	G/G Ratio=0	C/C Ratio=0	G/G Ratio=0	A/G Ratio=62.62	2	53
111	G/C Ratio=51.78	T/T Ratio=0	A/A Ratio=100.00	C/C Ratio=0	G/C Ratio=49.65	A/G Ratio=56.25	2	29
112	G/G Ratio=0	T/T Ratio=0	G/G Ratio=0	C/T Ratio=46.46	G/C Ratio=55.46	G/G Ratio=100.00	2	54
113	G/G Ratio=0	T/G Ratio=48.91	G/A Ratio=48.02	C/C Ratio=0	G/G Ratio=0	A/G Ratio=59.91	2	52
114	G/G Ratio=0	T/T Ratio=0	A/A Ratio=100.00	C/C Ratio=0	G/G Ratio=0	A/A Ratio=0	2	41
115	G/G Ratio=0	T/T Ratio=0	A/A Ratio=100.00	C/C Ratio=0	G/G Ratio=0	A/A Ratio=0	1	68
116	G/G Ratio=0	T/T Ratio=0	A/A Ratio=100.00	C/C Ratio=0	G/G Ratio=0	A/A Ratio=0	1	69
117	G/G Ratio=0	T/T Ratio=0	A/A Ratio=100.00	C/C Ratio=0	G/G Ratio=0	A/A Ratio=0	2	52
118	G/G Ratio=0	T/G Ratio=48.92	G/A Ratio=50.28	C/C Ratio=0	G/G Ratio=0	A/G Ratio=53.62	1	52
119	G/G Ratio=0	T/G Ratio=49.71	G/A Ratio=43.32	C/C Ratio=0	G/G Ratio=0	A/G Ratio=57.70	2	63
120	G/G Ratio=0	G/G Ratio=100.00	G/G Ratio=0	C/C Ratio=0	G/G Ratio=0	G/G Ratio=100.00	2	55
121	G/G Ratio=0	T/G Ratio=50.15	G/A Ratio=43.81	C/C Ratio=0	G/G Ratio=0	A/G Ratio=60.23	2	51
122	G/G Ratio=0	T/T Ratio=0	A/A Ratio=100.00	C/C Ratio=0	G/G Ratio=0	A/A Ratio=0	1	51
123	G/G Ratio=0	T/T Ratio=0	A/A Ratio=100.00	C/C Ratio=0	G/G Ratio=0	A/G Ratio=57.30	2	40
124	G/G Ratio=0	T/G Ratio=48.55	G/A Ratio=40.95	C/C Ratio=0	G/G Ratio=0	A/G Ratio=55.69	2	52
125	G/G Ratio=0	T/T Ratio=0	A/A Ratio=100.00	C/C Ratio=0	G/G Ratio=0	A/A Ratio=0	2	54
126	G/G Ratio=0	T/G Ratio=49.24	G/G Ratio=0	C/T Ratio=51.10	G/C Ratio=44.09	G/G Ratio=100.00	2	58
127	G/G Ratio=0	T/G Ratio=49.76	G/A Ratio=48.68	C/C Ratio=0	G/G Ratio=0	A/G Ratio=56.55	2	41
128	G/G Ratio=0	T/T Ratio=0	A/A Ratio=100.00	C/C Ratio=0	G/G Ratio=0	A/A Ratio=0	1	38
129	G/G Ratio=0	T/G Ratio=49.98	G/A Ratio=48.26	C/C Ratio=0	G/G Ratio=0	A/G Ratio=54.45	2	53
130	G/G Ratio=0	T/T Ratio=0	G/G Ratio=0	T/T Ratio=100.00	C/C Ratio=100.00	G/G Ratio=100.00	2	44
131	G/G Ratio=0	T/T Ratio=0	A/A Ratio=100.00	C/C Ratio=0	G/G Ratio=0	A/A Ratio=0	1	48
132	G/C Ratio=49.55	T/G Ratio=49.53	G/A Ratio=48.15	C/C Ratio=0	G/C Ratio=49.74	G/G Ratio=100.00	1	48
133	G/G Ratio=0	T/T Ratio=0	G/G Ratio=0	T/T Ratio=100.00	C/C Ratio=100.00	G/G Ratio=100.00	2	51
134	G/G Ratio=0	T/T Ratio=0	A/A Ratio=100.00	C/C Ratio=0	G/G Ratio=0	A/A Ratio=0	1	52
135	G/G Ratio=0	T/G Ratio=49.64	G/A Ratio=49.86	C/C Ratio=0	G/G Ratio=0	A/G Ratio=55.48	1	47
136	G/G Ratio=0	T/T Ratio=0	A/A Ratio=100.00	C/C Ratio=0	G/G Ratio=0	A/A Ratio=0	1	59
137	G/G Ratio=0	T/T Ratio=0	A/A Ratio=100.00	C/C Ratio=0	G/G Ratio=0	A/A Ratio=0	1	52
138	G/G Ratio=0	T/G Ratio=49.56	G/A Ratio=47.59	C/C Ratio=0	G/G Ratio=0	A/G Ratio=56.36	1	50
139	G/G Ratio=0	T/T Ratio=0	A/A Ratio=100.00	C/C Ratio=0	G/G Ratio=0	A/G Ratio=56.92	1	48
140	G/C Ratio=49.53	T/T Ratio=0	G/A Ratio=50.00	C/T Ratio=52.68	C/C Ratio=100.00	G/G Ratio=100.00	1	58
141	G/G Ratio=0	T/G Ratio=49.66	G/A Ratio=40.81	C/C Ratio=0	G/G Ratio=0	A/G Ratio=58.61	1	61
142	G/G Ratio=0	T/T Ratio=0	A/A Ratio=100.00	C/C Ratio=0	G/G Ratio=0	A/A Ratio=0	1	51
143	G/G Ratio=0	T/T Ratio=0	A/A Ratio=100.00	C/C Ratio=0	G/G Ratio=0	A/A Ratio=0	1	52
144	G/G Ratio=0	T/T Ratio=0	A/A Ratio=100.00	C/C Ratio=0	G/G Ratio=0	A/A Ratio=0	2	57
145	G/G Ratio=0	T/T Ratio=0	G/A Ratio=48.67	C/C Ratio=0	G/C Ratio=41.24	A/G Ratio=59.41	1	57
146	G/G Ratio=0	T/T Ratio=0	A/A Ratio=100.00	C/C Ratio=0	G/G Ratio=0	A/A Ratio=0
147	NA/NA Ratio=0	T/G Ratio=55.56	NA/NA	NA/NA	NA/NA Ratio=0	NA/NA	1	64
148	G/G Ratio=0	T/G Ratio=49.30	G/A Ratio=42.91	C/C Ratio=0	G/G Ratio=0	A/G Ratio=55.69	2	61
149	NA/NA	T/T Ratio=0	NA/NA	NA/NA Ratio=0	NA/NA	NA/NA	2	61
150	G/G Ratio=0	T/T Ratio=0	A/A Ratio=100.00	C/C Ratio=0	G/G Ratio=0	A/A Ratio=0	2	50
151	G/C Ratio=49.96	T/G Ratio=48.79	G/A Ratio=52.91	C/C Ratio=0	G/C Ratio=45.58	A/G Ratio=58.23	1	62
152	G/G Ratio=0	T/T Ratio=0	A/A Ratio=100.00	C/C Ratio=0	G/G Ratio=0	A/A Ratio=0	2	49
153	G/G Ratio=0	T/T Ratio=0	A/A Ratio=100.00	C/C Ratio=0	G/G Ratio=0	A/A Ratio=0	2	70
154	G/G Ratio=0	T/T Ratio=0	A/A Ratio=100.00	C/C Ratio=0	G/G Ratio=0	A/A Ratio=0	2	43
155	G/G Ratio=0	T/G Ratio=48.91	G/G Ratio=0	C/T Ratio=48.63	G/C Ratio=49.75	G/G Ratio=100.00	2	43
156	G/G Ratio=0	T/G Ratio=50.06	G/G Ratio=0	C/C Ratio=0	G/G Ratio=0	A/G Ratio=57.86	1	52
157	G/G Ratio=0	G/G Ratio=100.00	G/G Ratio=0	C/C Ratio=0	G/G Ratio=0	G/G Ratio=100.00	1	61
158	G/G Ratio=0	T/T Ratio=0	G/G Ratio=0	C/T Ratio=52.99	G/C Ratio=47.31	G/G Ratio=100.00	2	35
159	G/C Ratio=49.74	T/G Ratio=48.83	G/A Ratio=48.51	C/C Ratio=0	G/C Ratio=50.33	A/G Ratio=57.68	1	53
160	G/G Ratio=0	T/T Ratio=0	G/A Ratio=47.26	C/C Ratio=0	G/G Ratio=0	A/G Ratio=55.36	2	60
161	G/G Ratio=0	T/T Ratio=0	A/A Ratio=100.00	C/C Ratio=0	G/G Ratio=0	A/A Ratio=0	2	44
162	G/C Ratio=51.20	T/T Ratio=0	A/A Ratio=100.00	C/C Ratio=0	G/C Ratio=49.17	A/G Ratio=55.74	2	62
163	G/G Ratio=0	T/T Ratio=0	G/G Ratio=0	T/T Ratio=100.00	C/C Ratio=100.00	G/G Ratio=100.00	2	55
164	G/G Ratio=0	T/T Ratio=0	G/A Ratio=45.55	C/T Ratio=51.94	G/C Ratio=48.61	A/A Ratio=0	1	52
165	C/C Ratio=100.00	T/T Ratio=0	A/A Ratio=100.00	C/C Ratio=0	C/C Ratio=100.00	G/G Ratio=100.00	2	54
166	G/G Ratio=0	T/G Ratio=50.29	G/A Ratio=48.21	C/C Ratio=0	G/G Ratio=0	A/G Ratio=56.06	2	44
167	G/G Ratio=0	T/T Ratio=0	A/A Ratio=100.00	C/C Ratio=0	G/G Ratio=0	A/G Ratio=56.46	2	58
168	G/G Ratio=0	T/G Ratio=49.94	G/A Ratio=55.71	C/C Ratio=0	G/G Ratio=0	A/G Ratio=57.32	1	44
169	G/G Ratio=0	T/G Ratio=49.65	G/G Ratio=0	C/T Ratio=50.07	G/C Ratio=49.73	G/G Ratio=100.00	1	58
170	G/G Ratio=0	T/G Ratio=48.92	G/A Ratio=45.11	C/C Ratio=0	G/G Ratio=0	A/G Ratio=56.94	1	47
171	G/G Ratio=0	T/G Ratio=49.61	G/G Ratio=0	C/C Ratio=0	G/G Ratio=0	A/G Ratio=52.41	1	51
172	G/G Ratio=0	T/T Ratio=0	G/A Ratio=47.62	C/T Ratio=56.42	G/C Ratio=52.13	A/G Ratio=52.93	1	45
173	G/C Ratio=50.04	T/T Ratio=0	G/A Ratio=53.70	C/C Ratio=0	G/C Ratio=46.77	A/G Ratio=53.48	1	46
174	G/G Ratio=0	T/G Ratio=49.80	G/A Ratio=45.70	C/C Ratio=0	G/G Ratio=0	A/G Ratio=56.92	1	45
175	G/G Ratio=0	T/G Ratio=49.26	G/A Ratio=45.31	C/C Ratio=0	G/G Ratio=0	A/G Ratio=58.53	1	40
176	G/G Ratio=0	T/T Ratio=0	A/A Ratio=100.00	C/C Ratio=0	G/G Ratio=0	A/A Ratio=0	1	57
177	G/G Ratio=0	T/T Ratio=0	A/A Ratio=100.00	C/C Ratio=0	G/G Ratio=0	A/A Ratio=0	1	45
178	G/G Ratio=0	T/T Ratio=0	A/A Ratio=100.00	C/C Ratio=0	G/G Ratio=0	A/A Ratio=0	1	64
179	G/C Ratio=50.58	T/T Ratio=0	G/A Ratio=46.81	C/C Ratio=0	G/C Ratio=50.15	A/G Ratio=54.49	2	56
180	G/G Ratio=0	T/G Ratio=30.10	G/G Ratio=0	C/C Ratio=0	G/G Ratio=0	A/G Ratio=58.26	1	22
181	G/G Ratio=0	T/T Ratio=0	G/A Ratio=48.28	C/T Ratio=45.63	G/C Ratio=45.00	A/G Ratio=65.18	1	49
182	G/G Ratio=0	T/G Ratio=48.67	G/G Ratio=0	C/C Ratio=0	G/G Ratio=0	A/A Ratio=0	1	47
183	G/G Ratio=0	T/T Ratio=0	A/A Ratio=100.00	C/C Ratio=0	G/G Ratio=0	A/A Ratio=0	2	48
184	G/C Ratio=48.20	T/T Ratio=0	A/A Ratio=100.00	C/C Ratio=0	G/C Ratio=42.35	A/G Ratio=58.94	1	51
185	G/G Ratio=0	T/T Ratio=0	A/A Ratio=100.00	C/C Ratio=0	G/G Ratio=0	A/A Ratio=0	1	49
186	G/G Ratio=0	T/G Ratio=40.59	G/A Ratio=53.24	C/C Ratio=0	G/G Ratio=0	A/G Ratio=43.93	1	61
187	G/G Ratio=0	T/T Ratio=0	A/A Ratio=100.00	C/C Ratio=0	G/G Ratio=0	A/A Ratio=0	2	50
188	G/G Ratio=0	T/T Ratio=0	A/A Ratio=100.00	C/C Ratio=0	G/G Ratio=0	A/A Ratio=0	2	34
189	G/G Ratio=0	T/G Ratio=48.60	G/A Ratio=46.17	C/C Ratio=0	G/G Ratio=0	A/G Ratio=56.57	2	53
190	G/G Ratio=0	T/G Ratio=49.21	G/A Ratio=45.63	C/C Ratio=0	G/G Ratio=0	A/G Ratio=58.67	1	51
191	G/G Ratio=0	T/T Ratio=0	G/A Ratio=51.53	C/C Ratio=0	G/G Ratio=0	A/A Ratio=0	2	63
192	G/G Ratio=0	T/T Ratio=0	G/G Ratio=0	C/C Ratio=0	G/G Ratio=0	A/G Ratio=61.17	1	52
193	G/C Ratio=50.44	T/T Ratio=0	A/A Ratio=100.00	C/C Ratio=0	G/C Ratio=52.00	A/G Ratio=55.71	2	56
194	G/G Ratio=0	T/G Ratio=49.08	G/G Ratio=0	C/T Ratio=52.90	G/C Ratio=40.00	G/G Ratio=100.00	2	49
195	G/G Ratio=0	T/T Ratio=0	A/A Ratio=100.00	C/C Ratio=0	G/G Ratio=0	A/A Ratio=0	2	44
196	G/G Ratio=0	T/T Ratio=0	A/A Ratio=100.00	C/C Ratio=0	G/G Ratio=0	A/A Ratio=0	2	59
197	G/C Ratio=50.71	T/T Ratio=0	G/A Ratio=45.31	C/C Ratio=0	G/C Ratio=55.17	G/G Ratio=100.00	2	63
198	G/G Ratio=0	T/T Ratio=0	G/A Ratio=41.80	C/C Ratio=0	G/G Ratio=0	A/G Ratio=59.22	2	48
199	G/C Ratio=49.86	T/T Ratio=0	A/A Ratio=100.00	C/C Ratio=0	G/C Ratio=48.39	A/G Ratio=60.85	2	53
200	G/G Ratio=0	T/T Ratio=0	A/A Ratio=100.00	C/C Ratio=0	G/G Ratio=0	A/A Ratio=0	2	53
201	G/G Ratio=0	T/G Ratio=48.91	G/A Ratio=55.56	C/T Ratio=39.58	G/C Ratio=40.48	A/G Ratio=59.77	2	50
202	G/G Ratio=0	T/T Ratio=0	G/A Ratio=44.84	C/C Ratio=0	G/G Ratio=0	A/A Ratio=0	2	53
203	G/G Ratio=0	T/T Ratio=0	G/A Ratio=50.06	C/C Ratio=0	G/G Ratio=0	A/G Ratio=57.39	2	45
204	G/G Ratio=0	T/T Ratio=0	A/A Ratio=100.00	C/C Ratio=0	G/G Ratio=0	A/A Ratio=0	2	31
205	G/G Ratio=0	T/G Ratio=49.08	G/A Ratio=53.38	C/C Ratio=0	G/G Ratio=0	A/G Ratio=53.97	2	46
206	G/G Ratio=0	T/T Ratio=0	A/A Ratio=100.00	C/C Ratio=0	G/G Ratio=0	A/A Ratio=0	2	32
207	G/G Ratio=0	T/T Ratio=0	G/A Ratio=50.07	C/T Ratio=48.39	G/C Ratio=51.67	A/A Ratio=0	2	51
208	G/G Ratio=0	T/G Ratio=49.64	G/A Ratio=48.31	C/C Ratio=0	G/G Ratio=0	A/G Ratio=53.94	2	53
209	G/G Ratio=0	G/G Ratio=100.00	G/G Ratio=0	C/C Ratio=0	G/G Ratio=0	A/G Ratio=61.52	2	52
210	G/G Ratio=0	T/T Ratio=0	A/A Ratio=100.00	C/C Ratio=0	G/G Ratio=0	A/A Ratio=0	2	49
211	G/G Ratio=0	T/T Ratio=0	A/A Ratio=100.00	C/C Ratio=0	G/G Ratio=0	A/A Ratio=0	2	39
212	62	152	362	74	132	268
